1 **The *Arabidopsis* immune receptor EFR increases resistance to the bacterial**  
2 **pathogens *Xanthomonas* and *Xylella* in transgenic sweet orange**

3

4 Leticia Kuster Mitre<sup>1,2,\*</sup>, Natália Sousa Teixeira-Silva<sup>1,\*</sup>, Katarzyna Rybak<sup>3</sup>, Diogo  
5 Maciel Magalhães<sup>1,2</sup>, Reinaldo Rodrigues de Souza-Neto<sup>1,2</sup>, Silke Robatzek<sup>3</sup>, Cyril  
6 Zipfel<sup>4,5</sup> and Alessandra Alves de Souza<sup>1</sup>

7

8 <sup>1</sup>Centro de Citricultura Sylvio Moreira – IAC, Cordeirópolis, SP, Brazil; <sup>2</sup>University of  
9 Campinas, Campinas, SP, Brazil; <sup>3</sup>LMU Biocenter, Ludwig-Maximilians-Universität  
10 München, Martinsried, Germany; <sup>4</sup>Institute of Plant and Microbial Biology and Zürich-  
11 Basel Plant Science Center, University of Zürich, Zürich, Switzerland; <sup>5</sup>The Sainsbury  
12 Laboratory, University of East Anglia, Norwich Research Park, Norwich, United  
13 Kingdom.

14

15 \* These authors contributed equally to this work

16

17 Corresponding author:

18 *Alessandra Alves de Souza*

19 *Tel: +55 19 35461399*

20 *E-mail: [desouza@ccsm.br](mailto:desouza@ccsm.br)*

21

22 **Keywords:** Broad-spectrum disease resistance; Citrus canker; Citrus variegated chlorosis  
23 (CVC); Pathogen-associated molecular pattern (PAMP); Pattern recognition receptor;  
24 Outer membrane vesicle (OMV).

25

26 **Summary**

27 Plants employ cell surface receptors to recognize pathogen (or microbe)-associated  
28 molecular patterns (PAMPs/MAMPs), which are crucial for immune system activation.  
29 The well-studied *Arabidopsis thaliana* ELONGATION FACTOR-TU RECEPTOR  
30 (EFR) recognizes the conserved bacterial PAMP EF-Tu, and the derived peptides elf18  
31 and elf26. The interfamily transfer of EFR has been shown to increase disease resistance  
32 in several crops, such as tomato, rice, wheat, and potato. Here, we generated sweet orange  
33 (*Citrus sinensis*) transgenic lines expressing *EFR* to test if it would confer broad-spectrum  
34 resistance against two important citrus bacterial diseases: citrus canker and citrus

35 variegated chlorosis (CVC). Independent EFR transgenic lines gained responsiveness to  
36 elf18 and elf26 peptides from *Xanthomonas citri* and *Xylella fastidiosa*, as measured by  
37 reactive oxygen species (ROS) production, mitogen-activated protein kinase (MAPK)  
38 activation and defense gene expression. Consistently, infection assays showed that  
39 *Citrus-EFR* transgenic plants were more resistant to citrus canker and CVC. Our results  
40 show that the EFR immune receptor can improve plant immunity in a perennial crop  
41 against bacterial pathogens, opening perspectives to engineer durable broad-spectrum  
42 disease resistance under field conditions.

43

## 44 **Introduction**

45 Plants evolved a sophisticated and highly efficient immune system as a protective  
46 mechanism against potential pathogens from the surrounding environment. Receptor  
47 kinases (RKs) and receptor-like proteins (RLPs) anchored to the cell surface function as  
48 pattern recognition receptors (PRRs) (Macho and Zipfel, 2014). These receptors sense  
49 pathogen-/microbe-/damage-associated molecular patterns (PAMPS/MAMPs/DAMPs),  
50 which are the initial event to activate pattern-triggered immunity (PTI) (Wan *et al.*, 2019).  
51 RKs are composed of an extracellular ligand-binding domain, a single-pass  
52 transmembrane domain, and a cytoplasmic kinase domain, whereas RLPs share the same  
53 basic structure, but lack a kinase domain (Boutrot and Zipfel, 2017).

54 PRRs recognize a large variety of PAMPs (proteins, carbohydrates, or lipids) that  
55 are generally conserved molecules essential for microbe survival (Boutrot and Zipfel,  
56 2017). After elicitor recognition, defense responses are activated to prevent pathogen  
57 establishment and disease progression, including the production of reactive oxygen  
58 species (ROS), callose deposition, activation of Ca<sup>2+</sup>-dependent protein kinases and  
59 mitogen-activated protein kinases (MAPKs), and induction of defense genes (Zipfel and  
60 Oldroyd, 2017).

61 Several members of the leucine-rich repeat (LRR)-RK subfamily XII are PRRs  
62 recognizing bacterial proteinaceous PAMPs. Among them, the *Arabidopsis thaliana*  
63 (hereafter *Arabidopsis*) FLAGELLIN SENSING 2 (FLS2) and EF-TU RECEPTOR  
64 (EFR) are the receptors for bacterial flagellin (or the derived epitope flg22) and EF-Tu  
65 (or the derived epitopes elf18 and elf26) (Gómez-Gómez and Boller, 2000; Zipfel *et al.*,  
66 2006). While FLS2 is present in all higher plants, some plant species have developed  
67 additional receptors for flagellin. The FLS3 receptor present in *Solanaceae* plants  
68 recognizes the flagellin epitope flgII-28 (Hind *et al.*, 2016), while rice perceives the

69 *Acidovorax avenae* flagellin via a yet-unknown receptor (Katsuragi *et al.*, 2015).  
70 Different from FLS2, EFR is restricted to the *Brassicaceae* family (Zipfel *et al.*, 2006).  
71 However, another fragment in the middle region of EF-Tu (termed Efa50) can be  
72 recognized via a yet-unknown receptor in some rice varieties (Furukawa *et al.*, 2014).

73 Genetic transfer of PRRs has been shown to be effective in conferring broad-  
74 spectrum resistance in several crop species, demonstrating that downstream signaling  
75 components are widely conserved even among phylogenetically distant species (Boutrot  
76 and Zipfel, 2017; Rodriguez-Moreno *et al.*, 2017). Particularly, EFR from *Arabidopsis*  
77 was reported to confer resistance in *Nicotiana benthamiana* and tomato against  
78 phytopathogenic bacteria belonging to different genera (Kunwar *et al.*, 2018; Lacombe *et*  
79 *al.*, 2010). Rice plants expressing *EFR* also showed increased resistance against two  
80 pathogenic bacteria, *Xanthomonas oryzae* pv. *oryzae* and *A. avenae* subsp. *avenae*  
81 (Holton *et al.*, 2015; Lu *et al.*, 2015; Schwessinger *et al.*, 2015). Transgenic *EFR*-  
82 expressing wheat demonstrated enhanced resistance to *Pseudomonas syringae* pv. *oryzae*  
83 (Schoonbeek *et al.*, 2015), and more recently, potato and *Medicago truncatula* expressing  
84 EFR showed greater resistance to *Ralstonia solanacearum* (Boschi *et al.*, 2017;  
85 Pfeilmeier *et al.*, 2019).

86 Bacterial diseases have been associated with major economic losses in  
87 commercial citrus orchards. Especially, Brazil, the biggest sweet orange (*Citrus sinensis*)  
88 producer, faces serious problems to manage citrus bacterial pathogens (Neves *et al.*,  
89 2020). Among them, citrus canker and citrus variegated chlorosis (CVC), caused by *X.*  
90 *citri* subsp. *citri* and *Xylella fastidiosa* subsp. *pauca*, respectively, are important bacterial  
91 diseases and are therefore extensively studied due to their impact on citrus agribusiness  
92 (Caserta *et al.*, 2020; Coletta-Filho *et al.*, 2020; Martins *et al.*, 2020). All sweet orange  
93 (*Citrus sinensis*) commercial varieties are susceptible to both diseases and, despite many  
94 efforts, no natural resistance has been found in *C. sinensis* so far. The most effective  
95 approach for citrus breeding is based on gene introgression from close relatives; however,  
96 obtaining varieties carrying durable resistance combined with desirable agronomic traits  
97 can be challenging and time-demanding (Machado *et al.*, 2011). Thus, biotechnological  
98 approaches are a powerful strategy to support programs in increasing resistance to biotic  
99 stresses (Caserta *et al.*, 2020). Since EF-Tu is present in the biofilm of both bacteria (Silva  
100 *et al.*, 2011; Zimaro *et al.*, 2013) and the outer membrane vesicles (OMVs) released by  
101 *X. fastidiosa* (Nascimento *et al.*, 2016), we hypothesized that *EFR* gene transfer as an  
102 attempt to conferring broad-spectrum resistance in citrus plants shows great potential.

103 Here, we generated transgenic sweet orange expressing *EFR*. The transgenic lines  
104 were able to sense elf peptides from *X. citri* and *X. fastidiosa*, as measured by ROS  
105 production, MAPK activation and defense marker gene expression. This activation and  
106 signaling of the citrus immune system culminated in reduced symptom development and  
107 increased resistance to citrus canker and CVC. This strategy provides commercial sweet  
108 orange varieties harboring important agronomic traits with PRR-based resistance against  
109 bacterial diseases to better support future needs of citrus breeding programs.

110

## 111 **Material and Methods**

### 112 **Vectors and plant genetic transformation**

113 The binary vector containing the *EFR* gene from *Arabidopsis* was chemically  
114 synthesized by the DNA Cloning Service e.K. company ([www.dna-cloning.com/](http://www.dna-cloning.com/)). The  
115 transgene is under the control of the Figwort Mosaic Virus (FMV) promoter and the  
116 *Agrobacterium* nopaline synthase (NOS) terminator. The vector carries kanamycin  
117 resistance on the T-DNA, streptomycin/spectinomycin-resistance for bacterial selection,  
118 and *gus* reporter gene (Fig. S1).

119 *Agrobacterium*-mediated transformation was used to produce citrus transgenic  
120 lines as previously described by Caserta *et al.* (2014). Seeds were sampled from mature  
121 Valencia sweet orange fruits and cultured in MS/2 solid medium for four weeks in the  
122 dark at 27 °C. Seedlings of about 15 cm in length were transferred to a 16-h photoperiod  
123 for 15 days and later used as explant source for genetic transformation. Epicotyl segments  
124 (0.8 - 1.0 cm) were excised and kept in liquid MS medium supplemented with indole  
125 acetic acid (100 mg L<sup>-1</sup>) before incubation in *Agrobacterium tumefaciens* (EHA105  
126 strain) suspension (10<sup>8</sup> CFU mL<sup>-1</sup>) for 5 minutes. Dried explants were transferred to solid  
127 MS co-culture medium supplemented with sucrose (30 g L<sup>-1</sup>), benzylaminopurine (BAP)  
128 (10 mg L<sup>-1</sup>), and myo-inositol (100 mg L<sup>-1</sup>) for three days (24 °C, in the dark). After the  
129 co-culture period, the explants were transferred to solid MS selection medium containing  
130 kanamycin (100 mg L<sup>-1</sup>) and cefotaxime (250 mg L<sup>-1</sup>) for four weeks (28 °C, in the dark)  
131 and then retransferred to 16-h photoperiod.

132 Kanamycin-resistant shoots were excised from the explants and incubated in 2mM  
133 X-Gluc solution (37 °C, overnight) for  $\beta$ -glucuronidase (*gus*) assay. Genomic DNA was  
134 extracted from leaves using the CTAB method (Doyle and Doyle, 1990) and PCR was  
135 performed with the annealing of the forward primers to the FMV promoter (FMV\_F) and  
136 the reverse primer within the *EFR* sequence (*EFR\_R*) (Table S1). The well-developed

137 and PCR positive shoots grown *in vitro* were directly grafted on Rangpur lime (*Citrus*  
138 *limonia*) rootstocks and kept under greenhouse conditions. Source plants were used to  
139 produce clones for subsequent evaluations. Transformation efficiency was calculated as  
140 the percentage of *gus*-positive shoots in the total of explants exposed to *Agrobacterium*  
141 culture.

142 *Nicotiana tabacum* was used as an experimental model to assess the role EFR  
143 plays in recognizing citrus bacterial PAMPs and its response to *X. fastidiosa* infection.  
144 The binary vector pEarlyGate103 containing the open reading frame of *Arabidopsis EFR*  
145 was used (Lacombe *et al.*, 2010; Zipfel *et al.*, 2006). Transgenic tobacco was produced  
146 by *Agrobacterium*-mediated transformation with the strain GV3101, as previously  
147 described (Gómez *et al.*, 2020). Vigorous shoots grew in selective media (MS/2  
148 supplemented with 2 µg mL<sup>-1</sup> phosphinothricin) were transferred to pots containing 2:1  
149 substrate/vermiculite and kept in an acclimatization room at 28 °C for 21 days. The  
150 presence of the expression cassette 35S::*EFR-GFP-His* was confirmed by PCR using  
151 genomic DNA as template and the primers 35S\_F and *EFR\_R* (Table S1).

152

### 153 **ROS production assay**

154 The peptides elf18<sub>Ec</sub> (ac-SKEKFERTKPHVNVGTIG), elf18<sub>Xcc</sub> (ac-  
155 AKAKFERTKPHVNVGTIG), and elf26<sub>Xf</sub> (ac-  
156 AQDKFKRTLHVNVGTIGHVDHGKTT) from *Escherichia coli*, *X. citri* and *X.*  
157 *fastidiosa*, respectively, were synthesized by Aminotech Research and Development.  
158 Leaf discs (0.5 cm) from young tender leaves were displaced on autoclaved water  
159 overnight in a 96-well plate at room temperature and then challenged by 100 µL of  
160 elicitation solution (17 mM luminol, 1 µM horseradish peroxidase and 100 nM elf18<sub>Ec</sub>,  
161 elf18<sub>Xcc</sub> or elf18<sub>Xf</sub>). Luminescence was immediately measured over 40 minutes using the  
162 Varioskan Flash Multiplate Reader (Thermo Scientific). Assays were performed in  
163 triplicates and statistical significance of the means calculated according to Tukey's test  
164 (\* *p* < 0.05).

165 For ROS production in response to *X. fastidiosa* bacteria, petioles of six- to seven-  
166 week-old *Arabidopsis* Col-0 and *efr-1* mutant plants (Zipfel *et al.*, 2006) were sampled  
167 using a scalpel and left overnight in sterile water. The following day the water was  
168 replaced with a solution containing 17 µg mL<sup>-1</sup> (w/v) luminol (Sigma), 10 µg mL<sup>-1</sup>  
169 horseradish peroxidase (Sigma) and living *X. fastidiosa* subsp. *fastidiosa* Temecula-1

170 (Ionescu *et al.*, 2014) cells (OD<sub>600</sub> 0.125). Luminescence was captured using a TECAN  
171 plate reader Infinite® 200 PRO.

172

### 173 **Gene expression analysis by RT-qPCR**

174 Total RNA was isolated from leaf tissue of transgenic and non-transgenic plants  
175 using the RNeasy Mini Kit (Qiagen) following the manufacturer's instructions and treated  
176 with RNase free-DNase (Promega). The RNA samples were PCR-tested for genomic  
177 DNA cross-contamination. RNA quality and concentration were assessed by gel  
178 electrophoresis and spectrophotometry (NanoDrop 8000 - Thermo Scientific). cDNA was  
179 synthesized from 1 µg total RNA using High-Capacity cDNA Reverse Transcription Kit  
180 (Applied Biosystems) using Oligo(dT)<sub>15</sub>. The relative expression values were analyzed  
181 using the SYBR Prime Script RT-PCR kit (Thermo Scientific) in ABI PRISM 7500 Fast  
182 (Applied Biosystems) and were determined by the  $\Delta\Delta C_t$  method (Livak and Schmittgen,  
183 2001). Expression values were normalized by the endogen *cyclophilin* for *C. sinensis* and  
184 by the gene *ARPC3* (Actin-related protein C3) for tobacco. The primers used for RT-  
185 qPCR are listed in Table S1. Assays were performed in triplicates and statistical  
186 significance of the means calculated according to Tukey's test (\*  $p < 0.05$ ).

187

### 188 **MAP kinase assay**

189 Leaf discs (0.5 cm) from young tender leaves were displaced on autoclaved water  
190 overnight in a 96-well plate at room temperature and were treated with flg22<sub>Pst</sub> from  
191 *Pseudomonas syringae*, elf18<sub>Ec</sub>, elf18<sub>Xcc</sub>, elf26<sub>Xf</sub>, or water (mock treatment) for 0, 30, and  
192 45 minutes and immediately frozen in liquid nitrogen. The samples were ground into  
193 powder before the addition of extraction buffer [50 mM Tris-HCl pH 7.5, 100 mM NaCl,  
194 15 mM EGTA, 10 mM MgCl<sub>2</sub>, 1 mM NaF, 1 mM Na<sub>2</sub>MoO<sub>4</sub>·2H<sub>2</sub>O, 0.5 mM NaVO<sub>3</sub>, 30  
195 mM β-glycerophosphate, 0.1 % IGEPAL CA 630, 100 nM calyculin A (CST), 0.5 mM  
196 PMSF, 1 % protease inhibitor cocktail (Sigma, P9599) and 5 % glycerol]. The extracts  
197 were centrifuged at 16,000 x g and 5x SDS loading buffer added. Protein concentrations  
198 were measured by the Bradford assay (Protein Assay Dye Reagent - Bio-Rad) and 30 µg  
199 of total protein was separated by 12 % SDS-PAGE and blotted onto PVDF membrane  
200 (Bio-Rad). The membranes were blocked in 5 % (w/v) BSA (Sigma) in TBS-Tween (0.1  
201 %) for 1 hour. The activated MAP kinases were detected using anti-p42/44 MAPK  
202 primary antibody (1:2500, Cell Signaling Technology, 4370) overnight at 4 °C, followed

203 by anti-rabbit HRP-conjugated secondary antibody (Sigma). Three independent  
204 experiments were performed with similar results.

205

### 206 **Seedling growth assay**

207 *Arabidopsis* Col-0, *efr-1* and *bak1-5* mutant seeds were surface-sterilized, sown  
208 on MS media supplemented with sucrose, stratified for 2 days at 4 °C in the dark and put  
209 in the light. Four days-old seedlings were transferred into liquid MS with or without  
210 *Xff*OMVs (see below) and incubated for ten further days. Fresh weight of seven replicates  
211 per treatment and genotype was measured using a precision scale and calculated relative  
212 to untreated control.

213 OMVs from *Xylella fastidiosa* subsp. *fastidiosa* Temecula-1 were isolated as  
214 described in Ionescu *et al.* (2014) with some modifications. Briefly, *X. fastidiosa* subsp.  
215 *fastidiosa* Temecula-1 was cultured in 100 mL of PD2 medium for seven days. Cells were  
216 removed by centrifugation at 10,000 × g for 15 min at 4 °C. The supernatant was filtered  
217 through 0.22 µm filter and centrifuged at 38,000 × g for 1 h at 4 °C. The supernatant was  
218 removed carefully and subjected to centrifugation at 150,000 × g for 4 h at 4 °C. The final  
219 pellet containing OMVs was resuspended in 1 mM EDTA (pH 8.0) and stored frozen at  
220 –80 °C until used.

221

### 222 ***Xanthomonas citri* infection assay**

223 *X. citri* subsp. *citri* strain 306 (Da Silva *et al.*, 2002) expressing GFP (Rigano *et*  
224 *al.*, 2007) was grown overnight in liquid NBY medium supplemented with ampicillin  
225 (100 mg L<sup>-1</sup>) and gentamicin (5 mg L<sup>-1</sup>). The bacterial suspension (10<sup>4</sup> CFU mL<sup>-1</sup>) was  
226 prepared in 1x phosphate-buffered saline (PBS) and infiltrated in three regions of three  
227 transgenic and non-transgenic fully expanded detached leaves. Citrus canker symptoms  
228 were evaluated 7 and 14 days after inoculation (dai). Leaf discs adjacent to the infiltration  
229 site were excised to assess the bacterial population from three independent leaves. This  
230 assay was performed in triplicates and the statistical significance of the means calculated  
231 according to the Student's *t*-test (\* *p* < 0.05).

232

### 233 ***Xylella fastidiosa* infection assay**

234 *X. fastidiosa* subsp. *pauca* strain 9a5c (Simpson *et al.*, 2000) was cultivated in  
235 solid periwinkle wilt medium (PWG) (Davis *et al.*, 1981) for 7 days at 28 °C. The bacterial  
236 suspension (10<sup>8</sup> CFU mL<sup>-1</sup>) was prepared in 1x PBS buffer for petiole inoculation on the

237 first leaf of ten transgenic and wild-type (WT) plants, for both transgenic tobacco and  
238 citrus. One month after inoculation, genomic DNA was extracted from petioles of the first  
239 leaf above the inoculation point (aip), as previously described, and bacterial detection was  
240 performed by PCR using RST31/33 primers (Minsavage *et al.*, 1994). Only the *Xylella*-  
241 positive and mock-inoculated individuals were maintained for further analysis.

242 Transgenic citrus plants were evaluated regarding *X. fastidiosa* population 18  
243 months after inoculation by qPCR in ABI PRISM 7500 Fast (Applied Biosystems).  
244 Petioles were collected in two different parts of the plants for total DNA extraction, at 5  
245 and 30 cm aip. The quantification was performed using TaqMan PCR Master Mix  
246 (Applied Biosystems) using primers CVC-1 and CCSM-1 and the probe TAQCVC (Table  
247 S1) and the bacterial population was calculated according to the standard curve developed  
248 for *X. fastidiosa* (Oliveira *et al.*, 2002). Infected plants were evaluated for the disease  
249 severity and scored by three inspectors using a diagrammatic scale (Caserta *et al.*, 2017).

250 Three independent evaluations of the infected *EFR*-expressing tobacco plants  
251 were performed by three inspectors and scored for disease incidence at 30, 40, 50, and 60  
252 dai. The disease incidence corresponds to the proportion of symptomatic leaves by the  
253 total number of leaves multiplied by 100. The area under the disease progress curve  
254 (AUDPC) was calculated based on the trapezoidal integration model (Berger, 1988),  
255 according to the equation:  $AUDPC = (y_i + y_s) \div 2 \times t$ , where  $y_i$  refers to the mean of the  
256 incidence value given to symptoms at a given time point and  $y_s$  to the mean of the  
257 incidence value given to the immediately following time point, and  $t$  to the interval of  
258 time of each evaluation. Statistical significance of the means was evaluated according to  
259 the Student's *t*-test (\*  $p < 0.05$ ; \*\*  $p < 0.01$ ).

260 *Arabidopsis* Col-0 and *efr-1* plants were infected with *X. fastidiosa* subsp.  
261 *fastidiosa* Temecula-1 as described in Pereira *et al.* (2019). Briefly, twelve six- to seven-  
262 week-old plants per genotype were inoculated by dropping 5  $\mu$ L of bacterial inoculum or  
263 PBS buffer at the midrib. The petiole tissue under the drop was pricked seven to eight  
264 times using an insulin needle. After 14 days, petiole tissue below the infection point was  
265 harvested for DNA isolation and qPCR of the *HL* gene from *X. fastidiosa* subsp. *fastidiosa*  
266 Temecula-1.

267

## 268 **Results**

269 **EFR is responsive to elf peptides from *X. citri* and *X. fastidiosa***



270 We first examined the ability of EFR to respond to *X. fastidiosa* bacterial  
271 suspension. *Arabidopsis* Col-0 plants produced a prototypic ROS burst when challenged  
272 with living *X. fastidiosa* (Fig. 1a; Fig. S2a). This ROS burst was markedly reduced in *efr-*  
273 *1* mutants, suggesting the perception of immunogenic elf peptides from *X. fastidiosa* EF-  
274 Tu. Since EF-Tu is present in outer membrane vesicles (OMVs) released from *X.*  
275 *fastidiosa* (Feitosa-Junior *et al.*, 2019), we determined the effect of OMVs on *Arabidopsis*  
276 seedling growth, which is typically inhibited by continual PAMP treatment (Zipfel *et al.*,  
277 2006). The growth of *Arabidopsis* Col-0 seedlings was strongly repressed in the presence  
278 of *X. fastidiosa* OMVs (Fig. 1b). No growth repression was observed in *efr-1* or *bak1-5*,  
279 a mutant affected in the EFR co-receptor BRASSINOSTEROID INSENSITIVE 1-  
280 ASSOCIATED RECEPTOR KINASE 1 (BAK1) involved in PTI (Schwessinger *et al.*,  
281 2011). We then examined whether EFR modulates the success of *X. fastidiosa* infection  
282 in *Arabidopsis* (Pereira *et al.*, 2019). Compared to wild-type Col-0 plants, *efr-1* mutants  
283 supported higher bacterial loads of *X. fastidiosa*, quantified as *HL* gene abundance (Fig.  
284 1c). Thus, perception of EF-Tu (and potentially derived elf peptides) by EFR is sufficient  
285 to restrict *X. fastidiosa* colonization in *Arabidopsis*.

286 Prompted by these results, we next investigated whether the elf peptides derived  
287 from the citrus pathogenic bacteria *X. fastidiosa* and *X. citri* activate downstream  
288 responses upon perception by EFR. We tested ROS activation in *Arabidopsis* (Col-0) and  
289 in transgenic tobacco expressing *EFR*. We generated five transgenic tobacco lines (T1,  
290 T2, T3, T4, and T5) in which *EFR* integration and expression were confirmed (Fig. S3a,  
291 b). Since *Arabidopsis* (Col-0) naturally harbors EFR, the activation of ROS production  
292 quickly occurred after elf18<sub>Ec</sub> exposure (Fig. 1d, Fig S2b). Although there are sequence  
293 differences between elf peptides (Fig. 1d), ROS production was similarly observed when  
294 *Arabidopsis* leaf discs were challenged with elf18<sub>Xcc</sub> (Fig. 1e, Fig S2b). However, when  
295 treated with elf26<sub>Xf</sub>, ROS production was comparatively delayed and significantly lower  
296 (Fig. 1e, Fig S2b). A similar pattern was observed for the transgenic tobacco plants  
297 expressing *EFR* (Fig. 1f). Altogether, these findings reinforce that EFR can recognize  
298 peptides derived from citrus bacterial pathogens, indicating that its transfer to sweet  
299 orange might be a good strategy to confer broad recognition of these bacteria.

300

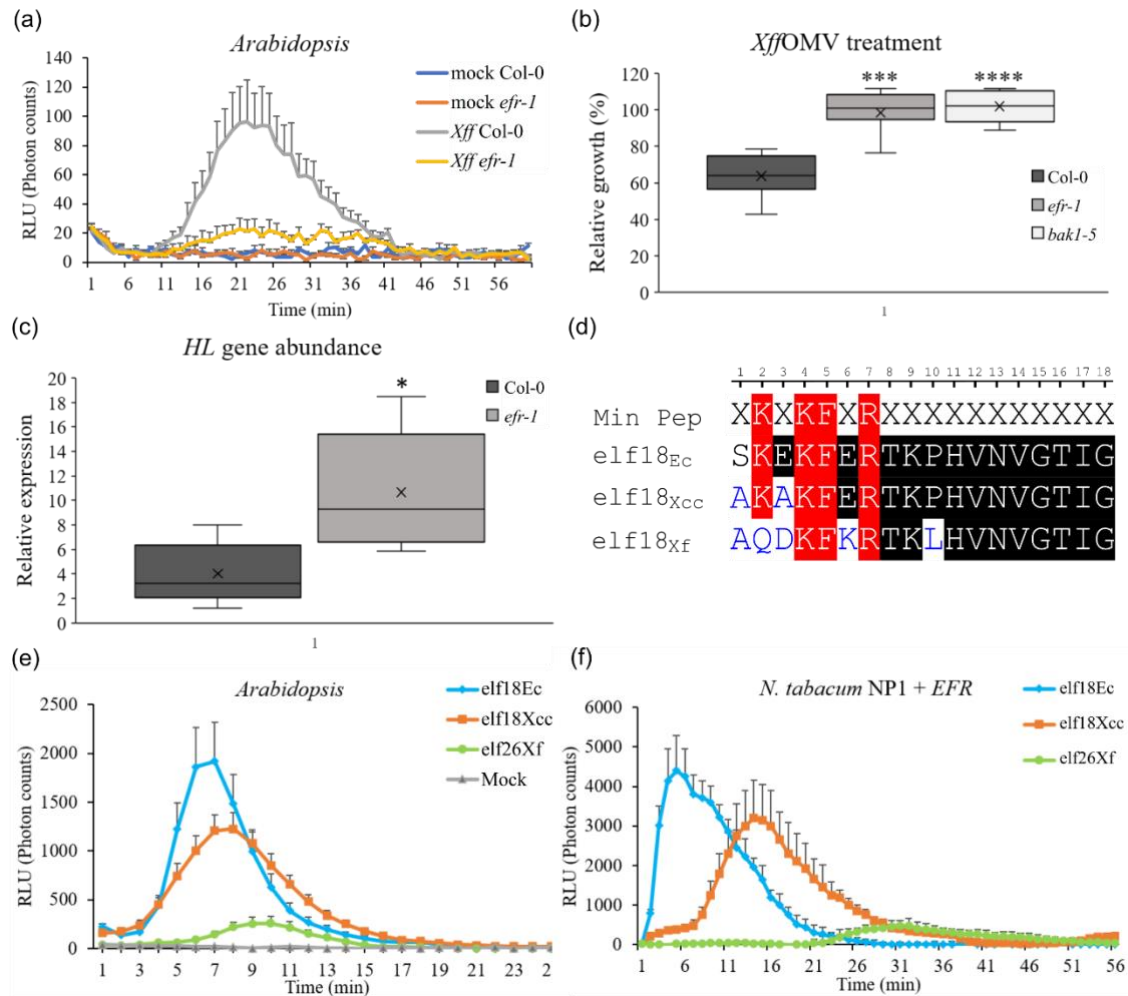

301

302 **Fig. 1** The perception of *X. fastidiosa* and elf peptides in *Arabidopsis* (Col-0 and *efr-1*)  
 303 and transgenic tobacco expressing *EFR*. (a) *efr-1* mutant is strongly impaired in *Xff*-  
 304 induced ROS burst. Average photon count, represented as RLU, over 60 min following  
 305 *Xff* treatment (n=10). (b) Seedling growth inhibition of Col-0, *efr-1* and *bak1-5* in the  
 306 presence of *XffOMVs* (1:50 dilution). Fresh weight is represented relative to untreated  
 307 control. Results are average +/- SEM (n=7) (c) Relative expression of *Xylella HL* in  
 308 *Arabidopsis* Col-0 and *efr-1* after infection by bacterial suspension (n=5). (d) Alignment  
 309 of the EF-Tu-derived elf18 sequences from *E. coli*, *X. citri* and *X. fastidiosa* compared to  
 310 the minimal peptide (in red, where X is any amino acid) required for full EFR elicitation.  
 311 Amino acids in blue represent substitutions in the respective peptide sequences. (e) ROS  
 312 production in *Arabidopsis* (Col-0) triggered by elf peptides from *E. coli* (elf18<sub>Ec</sub>), *X. citri*  
 313 (elf18<sub>Xcc</sub>) and *X. fastidiosa* (elf26<sub>Xf</sub>) (n=6). (f) Representation of ROS production in  
 314 transgenic tobacco expressing *EFR* after treatment with elf peptides (n=6). RLU: relative  
 315 light units. Values are means ± standard error (SE). Statistical differences were calculated  
 316 using a two-tailed t-test (\*  $p < 0.05$ ). The experiments were performed three times with  
 317 similar results.

318

319 **Citrus plants expressing EFR are responsive to elf peptides**

320 Nine independent transgenic lines of Valencia sweet orange (V1, V2, V3, V4, V5,  
321 V6, V7, V8, and V9) were successfully transformed with *EFR* (Table S2). Transgenic  
322 lines were selected by tissue culture via kanamycin selection and histochemical *gus* assay  
323 (Fig. 2a). Transgene integration and expression were confirmed by PCR and RT-qPCR,  
324 respectively (Fig. 2b, c). The relative transcript levels varied between lines, with V4  
325 showing the highest expression level, while V7 showed the lowest (Fig. 2c). Phenotypic  
326 abnormalities were absent after grafting in Rangpur lime rootstocks, except for the V6  
327 line, which showed compromised leaf morphology and vegetative development (data not  
328 shown). This line was therefore omitted from further assays.

329

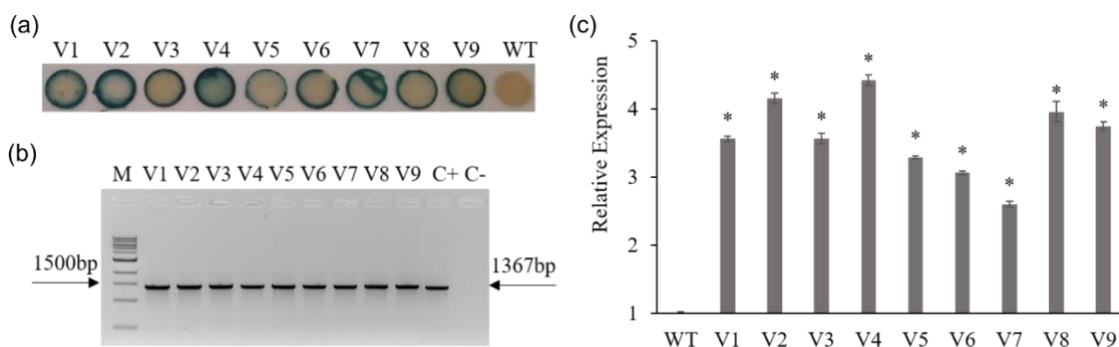

330

331 **Fig. 2** Molecular confirmation of *EFR*-expressing transgenic citrus plants. (a)  
332 Histochemical *gus* assay of transgenic lines and wild-type (WT). (b) Analysis of the PCR  
333 product (1367 bp) in 1 % agarose gel depicting the presence of the transgene in Valencia  
334 transgenic citrus lines. M: 1 kb Plus DNA Ladder (Fermentas); C+: positive  
335 control\_binary vector; C-: negative control\_sweet orange WT. (c) The relative expression  
336 level of *EFR* measured by RT-qPCR normalized by the expression of *cyclophilin*. Data  
337 are represented as the mean values  $\pm$  standard error (SE) of three technical replicates.  
338 Statistical differences were calculated using the Student's *t*-test (\*  $p < 0.05$ ). Experiments  
339 were repeated three times with similar results.

340

341 Attempting to verify the effectiveness of the sweet orange *EFR* transgenic lines in  
342 recognizing multiple elf peptides and to confirm whether *EFR* is functional in citrus, we  
343 challenged the transgenic plants with elf18<sub>Ec</sub>, and ROS production was measured in all  
344 transgenic lines, showing variable total ROS production levels (Fig. 3a). The recognition  
345 of elf18<sub>Ec</sub> and subsequent ROS production by the transgenic citrus plants indicate the  
346 functional conservation of the required intracellular signaling components in sweet  
347 orange. Similar results were obtained after treatment with the *X. citri* peptide, in which  
348 all transgenic lines were able to recognize elf18<sub>Xcc</sub> and trigger ROS production (Fig. 3b).  
349 Surprisingly, though, ROS production was not easily detected in most transgenic lines  
350 after elf26<sub>Xf</sub> challenging. A delayed and weaker ROS production was measured in the V4

351 and V5 lines (Fig. 3c). The lower elf26<sub>Xf</sub> activity was evident when compared to the peaks  
 352 obtained from both elf18<sub>Ec</sub> and elf18<sub>Xcc</sub> exposure (Fig. 3).

353 Since V4 and V5 could sense all the three peptides herein studied and showed the  
 354 best performance to activate immune responses in citrus, these lines were chosen to test  
 355 ROS production over time (Fig. 3d-e). The ROS peaks occurred 9 minutes after elf18<sub>Ec</sub>  
 356 treatment, lasting about 17 minutes (Fig. 3d). For elf18<sub>Xcc</sub> and elf26<sub>Xf</sub>, ROS peaks  
 357 occurred after 10 and 15 minutes, respectively (Fig. 3e-f). WT citrus plants were  
 358 insensitive to elf18<sub>Ec</sub>, elf18<sub>Xcc</sub>, and elf26<sub>Xf</sub> (Fig. 3a-c).

359

360

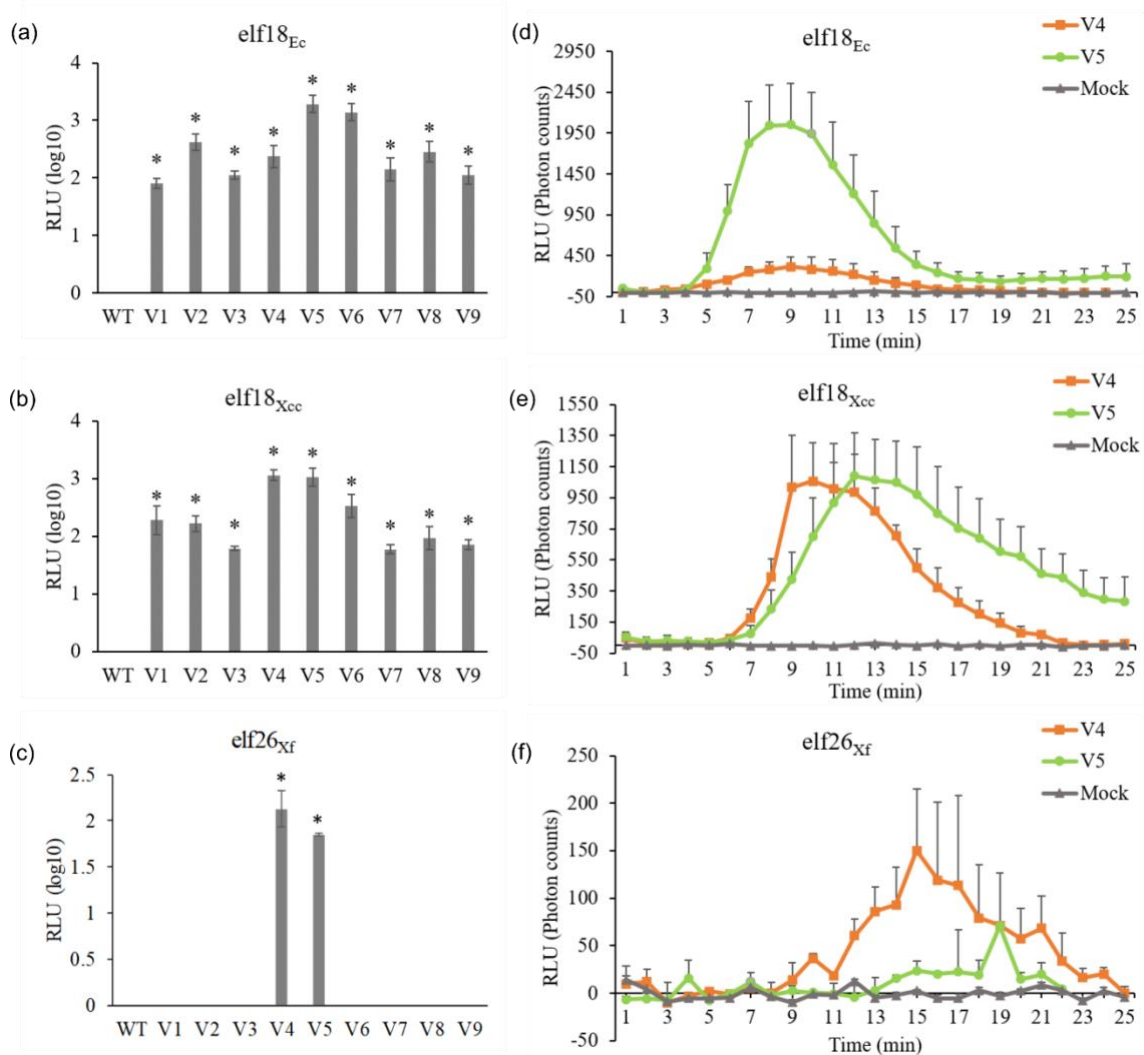

361

362 **Fig. 3** Perception of elf18<sub>Ec</sub>, elf18<sub>Xcc</sub>, or elf26<sub>Xf</sub> in *EFR* transgenic citrus plants (a, b, c)  
 363 ROS production in response to elf peptides was verified in nine transgenic lines. (d, e, f)  
 364 Temporal ROS production over 25 minutes in response to elf peptides in V4 and V5  
 365 transgenic lines. RLU: relative light units. Values are means ± standard error (SE) of at  
 366 least six biological replicates, except to elf26<sub>Xf</sub> (n=3). Statistical differences were

367 calculated using the Student's *t*-test (\*  $p < 0.05$ ). Experiments were repeated three times  
368 with similar results

369

### 370 **elf peptides activate MAPKs and defense-related genes in *EFR* citrus plants**

371 To test if *EFR* expression results in the activation of downstream immune  
372 responses, MAPK activation and the expression of defense-related genes were measured.  
373 MAPK phosphorylation was detected in both V4 and V5 transgenic lines compared to the  
374 mock treatment 30 and 45 minutes after elf treatment. For both transgenic lines, MAPK  
375 showed a stronger accumulation 45 minutes after elf peptide treatment (Fig. 4).  
376 Interestingly, constitutive activation was observed in the V5 line; nevertheless, MAPK  
377 activation still increased after peptide treatment (Fig. 4).

378

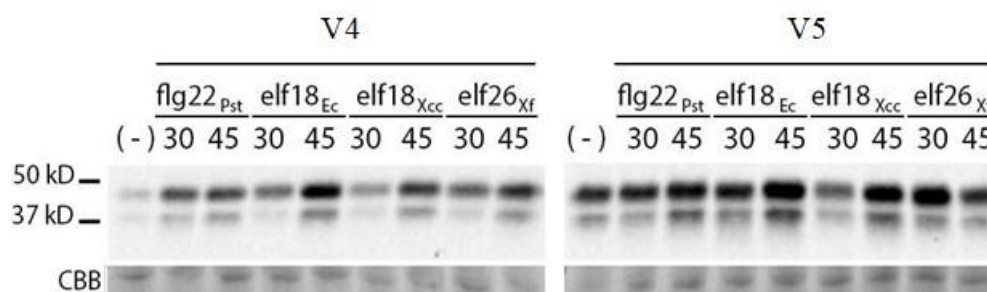

379

380 **Fig. 4** MAPK activation in transgenic sweet orange after treatment with elf peptides. The  
381 leaves were treated with elf18<sub>Ec</sub>, elf18<sub>Xcc</sub>, elf26<sub>Xf</sub> or flg22<sub>Pts</sub> (positive control) and water  
382 (-) and collected 30 and 45 minutes after treatment. MAPK phosphorylation was detected  
383 by western blotting using anti-phospho p44-p42-antibody. Even loading is demonstrated  
384 by Coomassie Brilliant Blue (CBB) staining. Experiments were repeated three times with  
385 similar results.

386

387 We sought to assess the expression behavior of four citrus defense marker genes  
388 (*SGT1*, *EDS1*, *WRKY23*, and *NPR2*) (Rodrigues *et al.*, 2013; Shi *et al.*, 2015). All genes  
389 were induced by elf peptides to different levels in the V4 and V5 transgenic lines  
390 compared to the mock treatment (Fig. 5). Notably, the upregulation of the genes in  
391 response to most peptides was stronger in V5 than in the V4 line. Besides, following the  
392 same pattern observed for ROS production, a stronger induction of defense genes was  
393 triggered after elf18<sub>Ec</sub> and elf18<sub>Xcc</sub> in comparison to elf26<sub>Xf</sub> treatment (Fig. 5).

394

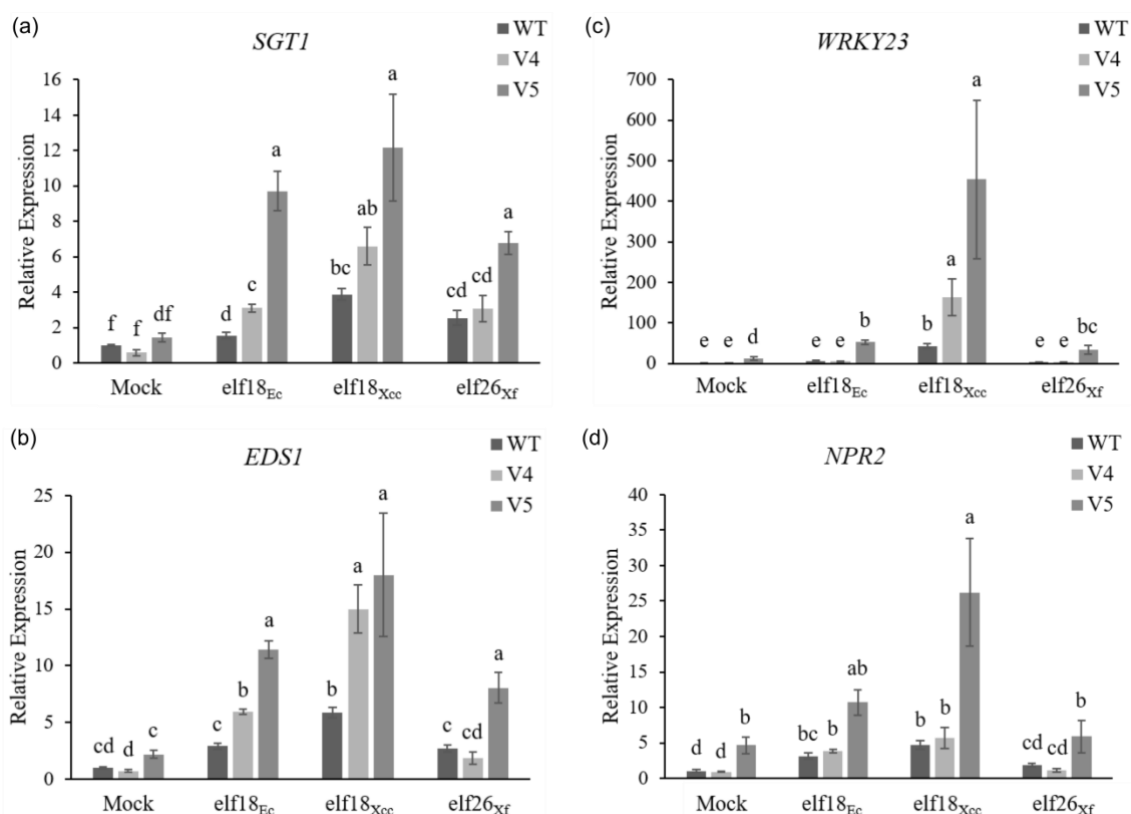

395

396

397

398

399

400

401

402

403

404

405

406

407

408

409

410

411

412

413

414

415

416

**Fig. 5** Expression pattern of defense-related genes in citrus-*EFR* transgenic lines V4 and V5. Four genes (*SGT1*, *WRKY23*, *EDS1*, and *NPR2*) were evaluated 3 hours after treatment with elf18<sub>Ec</sub>, elf18<sub>Xcc</sub> or elf26<sub>Xf</sub>, and water (mock). Relative gene expression levels were measured by RT-qPCR and normalized to the expression of *CYCLOPHILIN*. Fold change is relative to the mock treatment. Data are expressed as the mean values  $\pm$  standard error (SE) of three biological replicates. Different letters on the top of the bars indicate significant statistical differences among the mean values calculated with one-way ANOVA followed by Tukey's test ( $p < 0.05$ ).

### Transgenic sweet orange expressing *EFR* shows enhanced resistance to citrus canker

Since the presence of *EFR* enabled sweet orange to recognize elf peptides derived from bacteria infecting citrus and triggered immune signaling outputs, we evaluated whether the transgenic plants show enhanced resistance to citrus canker. Detached leaves were infiltrated with *X. citri* bacterial suspension and disease progression was assessed 7 and 14 days after inoculation (dai). Transgenic lines and WT plants did not show any canker symptom at 7 dai and bacterial growth was not significantly different among the treatments (Fig. 6b). Typical canker lesions developed in all inoculated leaves 14 dai (Fig. 6). Both transgenic lines showed reduced symptom severity when compared to the WT (Fig. 6a). Notably, the V5 line produced mild hyperplastic and water-soaked lesions, and petiole abscission, an advanced stage mark of canker disease, was never observed (Fig.

417 6a). Although reduced symptom development could be observed in V4, the bacterial  
418 population was not significantly different from the WT control. However, the pathogen  
419 growth in the V5 line was consistently lower, showing a reduction in the order of 3 log  
420 units (Fig. 6b). In this transgenic line, bacterial spreading and growth seem to be somehow  
421 restrained, thus corroborating symptomatology results (Fig. 6b).  
422

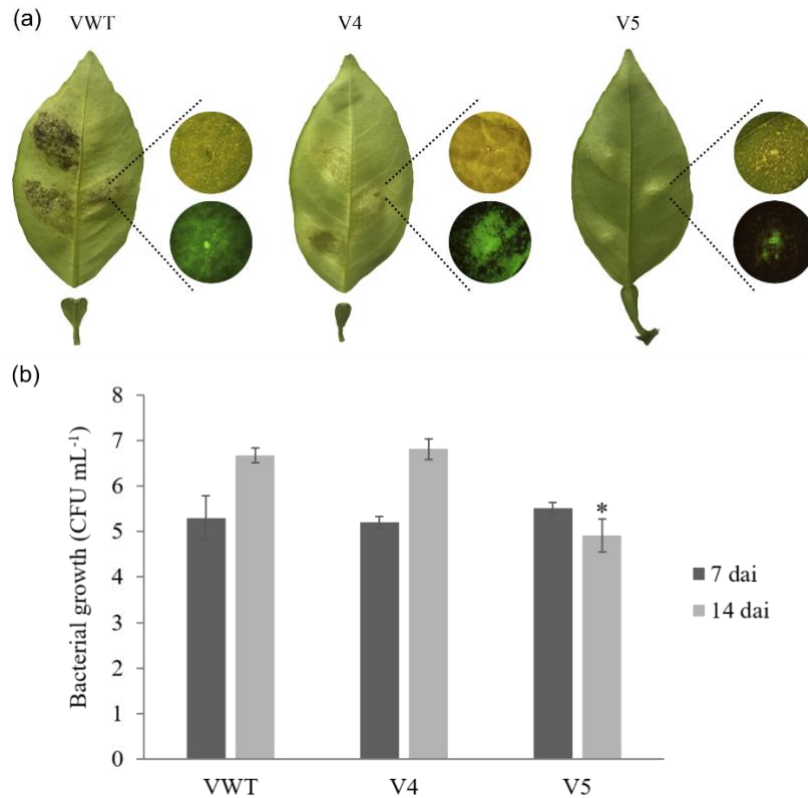

423  
424 **Fig. 6** Citrus canker disease assay in transgenic sweet orange detached leaves from V4  
425 and V5 lines, and the wild-type (WT). (a) Citrus canker symptomatology 14 days after *X.*  
426 *citri*-GFP infiltration. Circles represent the details of the area of infection in bright-field  
427 (upper circle) and the bacterial accumulation under GFP-fluorescence (lower circle). (b)  
428 Bacterial growth was evaluated in leaf discs adjacent to the inoculation point at 7 and 14  
429 dai. Data are expressed in log<sub>10</sub> and represent the means  $\pm$  standard error of three  
430 independent lesions. Statistical differences compared to WT were determined by the  
431 Student's *t*-test (\*  $p < 0.05$ ).  
432

### 433 ***EFR* expression prevents *X. fastidiosa* migration and decreases CVC symptoms**

434 To further investigate whether the presence of *EFR* can trigger immune responses  
435 upon *X. fastidiosa* infection, we first challenged transgenic tobacco expressing *EFR*. Most  
436 transgenic lines showed similar behaviors along with the disease progression, with a  
437 consistent reduction in symptoms development (Fig. S3c). To better assess the influence  
438 of the receptor in improving tolerance to *X. fastidiosa*, we calculated the area under the

439 disease progress curve (AUDPC) based on four time-points evaluated (Fig. S3d). The  
440 transgenic trait conferred a significant reduction in the progression of *X. fastidiosa*  
441 symptoms, showing that EFR enables pathogen recognition and weakens its development  
442 within the xylem vessels (Fig. S3).

443 *EFR*-expressing citrus plants were also challenged with the pathogen to assess the  
444 incidence and severity of CVC. One month after inoculation, the presence of *X. fastidiosa*  
445 was evaluated by PCR, and 52.4% of the total infected plants were positive. Positive  
446 plants were then selected for bacterial population and symptom analyses 18 months after  
447 inoculation. Among them, 71% showed colonization 5 cm aip, but not in more distal parts  
448 of the plant. This indicates that bacterial migration through the xylem vessels was  
449 restrained (Fig. 7a). In contrast, WT plants and only two transgenic clones were colonized  
450 in more distal regions, at 30 cm aip (Fig. 7a). Interestingly, though, the clones V4.6 and  
451 V5.10 were the clones with higher bacterial colonization and the only ones showing  
452 symptoms, following the same pattern observed for WT plants (Fig. 7b). Nevertheless,  
453 the symptom severity was much lower than observed in WT (Fig. 7c). Curiously,  
454 transgenic lines without long-distance colonization were symptom-free during the extend  
455 of the evaluated time course of 18 months (Fig. 7c). These results suggest that the  
456 presence of *EFR* affects bacterial colonization throughout the xylem.

457

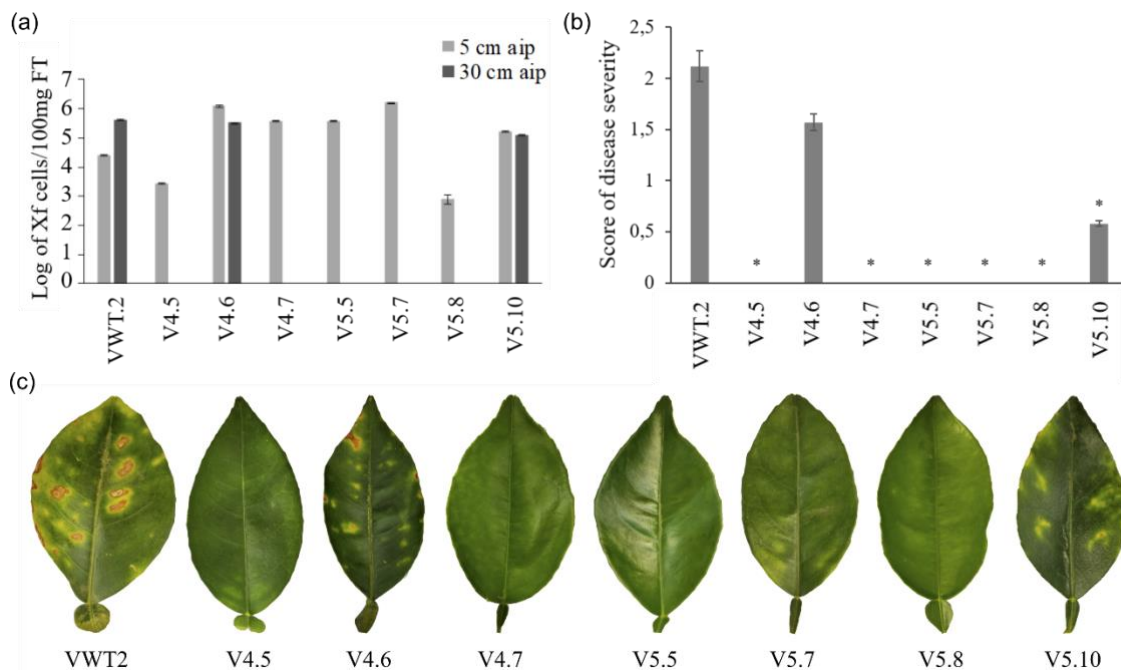

458

459 **Fig. 7** Evaluation of bacterial growth and CVC symptomatology in *EFR* transgenic sweet  
460 orange and wild-type (WT) 18 months after inoculation. (a) The *X. fastidiosa* population  
461 was evaluated at two different regions of the plant, 5 and 30 cm above inoculation point



462 (aip) by TaqMan assay. **(b)** The severity of CVC leaf symptoms. **(c)** Representative leaves  
463 showing CVC symptoms. Data are expressed as the means  $\pm$  standard error of three  
464 biological replicates. Statistical differences compared to WT were determined by the  
465 Student's *t*-test (\*  $p < 0.05$ ).

466

## 467 **Discussion**

468 In this study, we capitalized on observations in *Arabidopsis*, revealing EFR-  
469 dependent responses to *X. fastidiosa* and investigated whether the stable expression of  
470 *EFR* in sweet orange confers perception of EF-Tu derived from *X. citri* and *X. fastidiosa*  
471 and trigger immune responses. We demonstrated that the transgenic lines elicited  
472 conserved PTI outputs, such as ROS production, MAPK activation, and defense gene  
473 expression. Additionally, *EFR*-expressing citrus plants showed improved capacity to  
474 cope with both pathogens, culminating in reduced symptom development, and restrained  
475 pathogen colonization. This is the first report of a perennial species expressing the *EFR*  
476 receptor from *Arabidopsis* attempting to improve broad-spectrum resistance in sweet  
477 orange.

478 Improvements in crop fitness are increasingly desirable, especially considering  
479 the crop's ability to overcome major biotic and abiotic stresses in an environmental-  
480 friendly fashion. Particularly for citriculture, managing CVC and citrus canker in the  
481 orchards currently depend on the control of the insect vector by regular insecticide  
482 applications, and by large amounts of copper spraying, respectively (Coletta-Filho *et al.*,  
483 2020; Lamichhane *et al.*, 2018; Pignati *et al.*, 2017). Obtaining more resistant genotypes  
484 using biotechnology tools is an interesting strategy to anticipate plant security issues  
485 (Caserta *et al.*, 2020).

486 The heterologous expression of the EFR receptor, a *Brassicaceae*-specific PRR  
487 recognizing bacterial EF-Tu, is known to confer resistance and trigger multiple defense  
488 responses against several plant pathogenic bacteria. This strategy was effective in *N.*  
489 *benthamiana*, tomato, rice, wheat, potato, and *Medicago truncatula* (Boschi *et al.*, 2017;  
490 Kunwar *et al.*, 2018; Lacombe *et al.*, 2010; Pfeilmeier *et al.*, 2019; Schoonbeek *et al.*,  
491 2015; Schwessinger *et al.*, 2015). The manipulation of PTI-related genetic traits can  
492 create more durable resistance and assure more sustainable productivity (Boutrot and  
493 Zipfel, 2017).

494 Transgenic citrus plants overexpressing the receptors FLS2 from *Arabidopsis* or  
495 Xa21 from *Oryza longistaminata* were previously shown to enhance citrus canker

496 resistance (Hao *et al.*, 2016; Mendes *et al.*, 2010; Omar *et al.*, 2018; Shi *et al.*, 2016). In  
497 these cases, although citrus carries FLS2 orthologs, the receptor is likely to be weakly  
498 responsive or insensitive to flg22 from *X. citri* (flg<sub>Xcc</sub>) in sweet orange varieties (Shi *et*  
499 *al.*, 2015). Hamlin sweet orange and Carrizo citrange overexpressing *N. benthamiana*  
500 *FLS2* (*NbFLS2*) activated ROS production and defense marker genes in response to  
501 flg22<sub>Xcc</sub>, reducing canker susceptibility (Hao *et al.*, 2015). Similar results were observed  
502 when Xa21 was expressed in sweet orange and mandarins (Mendes *et al.*, 2010; Omar *et*  
503 *al.*, 2018). These data demonstrate that sweet orange PRR-mediated signaling cascades  
504 are likely to be conserved and imply that the heterologous expression of the receptors is  
505 useful to increase basal defense responses in susceptible citrus genotypes. In contrast,  
506 although good efforts have been made to assess citrus canker immune responses, no data  
507 is available regarding the roles that PRRs play over the causal agent of CVC. The  
508 fastidious behavior of *X. fastidiosa* to produce symptoms under greenhouse conditions is  
509 demanding and requires long-term trials, making disease resistance analysis challenging.

510         The ability of EFR to confer broad-spectrum resistance is related to the relatively  
511 high sequence conservation of its immunogenic ligands. Agriculturally-relevant  
512 phytopathogenic bacteria such as *A. avenae*, *P. syringae*, *R. solanacearum* and *X. oryzae*  
513 showed reduced ability to cause disease after *EFR* gene transfer (Lacombe *et al.*, 2010;  
514 Lu *et al.*, 2015; Schoonbeek *et al.*, 2015; Schwessinger *et al.*, 2015). Likewise, the  
515 transfer of *EFR* to sweet orange was effective to improve *X. citri* and *X. fastidiosa*  
516 perception and thereby to enhance citrus' immune system. The functionality of the EFR  
517 receptor was first confirmed by the ROS assay in response to elf18<sub>Ec</sub> peptide (Fig. 3a).  
518 This functional conservation indicates that, even with the high evolutionary distance  
519 between *Arabidopsis* and *Citrus*, PTI cascades share co-receptors and downstream  
520 components, as previously reported for other species (Holton *et al.*, 2015; Schwessinger  
521 *et al.*, 2015). The treatment with citrus pathogen-derived elf peptides led to a slightly  
522 delayed ROS burst, and although the consistent perception of the elf18<sub>Xcc</sub> occurs, mild  
523 ROS production was observed for the elf26<sub>Xf</sub> peptide (Fig. 3b, c). When compared to  
524 elf18<sub>Ec</sub>, the peptides elf18<sub>Xcc</sub> and elf18<sub>Xf</sub> have 2 and 5 amino acid substitutions at the N-  
525 terminus, respectively (Fig. 1d). Although elf18<sub>Xcc</sub> kept the four key conserved amino  
526 acids from the minimal peptide, the K2Q replacement in elf18<sub>Xf</sub> (Fig. 1d) caused a  
527 reduction of the EC<sub>50</sub> value to ~30 nM, since it is a key residue required for elf full activity  
528 (Kunze *et al.*, 2004). Here, we used elf26<sub>Xf</sub>, a longer version of elf peptide described to  
529 also show high reactivity with the EFR ectodomain (Kunze *et al.*, 2004). This longer

530 acetylated version of *X. fastidiosa* EF-Tu N-terminus was more efficient in eliciting  
531 immune responses in citrus transgenic plants (Fig. 3c, f).

532 PRRs engage signaling components upon PAMP perception (Zipfel and Oldroyd,  
533 2017). In agreement with established EFR-mediated signaling, seedling growth  
534 repression induced by OMVs from *X. fastidiosa* was impaired in the *bak1-5* mutant (Fig.  
535 1b), a mutant affected in the major PRR co-receptor BAK1 (Schwessinger *et al.*, 2011).  
536 Although some co-receptors, such as BAK1, are highly conserved (91% similarity)  
537 between *Citrus* and *Arabidopsis* (Fig. S4), other PRR interactors such as BIK1 are less  
538 so, yet showing considerable sequence conservation (80% similarity) (Fig. S5).  
539 Nevertheless, functional conservation is likely to occur in different extents of BAK1  
540 phosphorylation leading to regular MAPK activation in citrus *EFR*-transgenic plants. To  
541 verify this hypothesis, in addition to the ROS production, we evaluated well-characterized  
542 defense responses activated after PAMP recognition in citrus. The MAPK activation (Fig.  
543 4) and the expression profile of the defense marker genes *SGT1*, *WRKY23*, *EDS1*, and  
544 *NPR2* were assessed (Shi *et al.*, 2015) (Fig. 5). MAPK phosphorylation was consistent  
545 for all elf peptides, especially after 45 minutes of peptide treatment. It is noteworthy that,  
546 when compared to V4, the V5 line showed visible stronger activation, and this transgenic  
547 event showed some extent of constitutive MAPK activation even without PAMP  
548 treatment (Fig. 4); probably as a result of ectopic EFR expression and perception of  
549 naturally occurring bacteria in the citrus phyllosphere. It has been suggested that the auto-  
550 activation of the immune system can lead to ligand-independent enhanced disease  
551 resistance (Holton *et al.*, 2015), which could be the case for the V5 line. However, in this  
552 line higher MAPK activation could be induced upon elf treatment. Noteworthy, the V5  
553 line showed the highest increase in *X. citri* resistance, showing fewer symptoms compared  
554 to V4 and WT. When infected with *X. fastidiosa*, even when the bacteria could migrate  
555 throughout the host and produced chlorotic lesions, symptoms were milder compared to  
556 the WT plants. The differences in disease severity observed among the clones may be due  
557 to chimera, since this is a common feature in citrus transgenic plants (Caserta *et al.*, 2017;  
558 Domínguez *et al.*, 2004). This is likely to be the reason why the clones displayed variable  
559 levels of resistance to *X. fastidiosa*.

560 Although the induction of defense responses by *X. citri*- and *X. fastidiosa*-derived  
561 elf peptides was weaker than what was observed upon elf18<sub>Ec</sub> treatment, when the  
562 transgenic plants were challenged with the pathogens, the impact on colonization and  
563 symptom development was evident. The *X. citri* biofilm is highly enriched in EF-Tu

564 indicating that this protein is being recognized by EFR during bacterial growth.  
565 Noticeable citrus canker symptom reduction together with the restrained bacterial growth  
566 supports this hypothesis. Particularly, the V5 line proved to be more efficient in impairing  
567 pathogen progression, corroborating with all previous results, such as ROS production  
568 and the increased activation of MAPKs (Fig. 3e; Fig. 4).

569 To our knowledge, this is the first time that immune receptor mutants in the  
570 genetic model *Arabidopsis* and transgenic plants expressing a PRR receptor have been  
571 challenged with *X. fastidiosa*. This phytopathogen is a slow-growing bacterium requiring  
572 long experimental time courses of up to one year for symptom development and disease  
573 evaluation. On the other hand, *Arabidopsis* and tobacco are alternative hosts for *X.*  
574 *fastidiosa* and have been used to study many aspects of *Xylella*-plant host interactions  
575 (Caserta *et al.*, 2017; Ge *et al.*, 2020; Lopes *et al.*, 2020; Pereira *et al.*, 2019). Here, both  
576 *Arabidopsis* and tobacco model plants were used to determine the behavior of *X.*  
577 *fastidiosa* when *EFR* was knocked-out or expressed (Fig. 1, Fig. S2 and S3). The assays  
578 indicated that EFR recognizes *X. fastidiosa* and subsequently activates plant defenses  
579 since significantly less symptoms were observed in *EFR*-expressing plants (Fig. 1, Fig.  
580 S2 and S3). These results encouraged us to transform a commercial variety of sweet  
581 orange, where, in agreement with what was observed for tobacco, reduced symptom  
582 severity in transgenic lines. In addition, *X. fastidiosa* failed in colonizing more distal parts  
583 of the majority of *EFR* citrus transgenic lines. Even in the individual clones where  
584 bacterial colonization was higher, symptom severity was mild compared to the WT (Fig.  
585 7b, c). It is already known that when *X. fastidiosa* reaches high populations the biofilm  
586 produced in the xylem vessels is rich in EF-Tu (Silva *et al.*, 2011). So, we hypothesized  
587 that it can be recognized by EFR and trigger PTI. The extracellular products of OMV  
588 released by *X. fastidiosa* in xylem vessels may have alternative roles that might modulate  
589 movement and biofilm formation in the host (Ionescu *et al.*, 2014). Interestingly, the  
590 OMVs produced by *X. fastidiosa* have abundant EF-Tu content (Nascimento *et al.*, 2016)  
591 likely to be involved with functions other than protein synthesis (Matsumoto *et al.*, 2012).  
592 In turn, plants can recognize immunogenic patterns present in OMVs (Bahar *et al.*, 2016),  
593 consistent with OMV-induced seedling growth repression (Fig. 1b). Therefore, we  
594 suggest that OMVs may move along the xylem vessels releasing sufficient EF-Tu to be  
595 recognized by EFR expressed in the transgenic lines. Thus, the host immune system is  
596 activated and prevents further bacterial colonization and establishment. Our results show  
597 that this approach can be an interesting strategy to improve disease resistance in

598 agriculturally relevant species affected by *X. fastidiosa*, such as grapevine, olives,  
599 almonds, and coffee (Almeida *et al.*, 2019; Coletta-Filho *et al.*, 2020).

600 To the best of our knowledge, citrus lacks receptors capable of recognizing EF-  
601 Tu. Although EFR is restricted to the *Brassicaceae* family, recognition of EF-Tu by an  
602 unknown receptor has been reported in rice (Furukawa *et al.*, 2014). Although no EFR  
603 homolog was found in *Citrus* so far (Magalhães *et al.*, 2016), two LRR-RKs were highly  
604 expressed in the resistant species *C. reticulata* after *X. fastidiosa* infection (Rodrigues *et*  
605 *al.*, 2013). These genes were classified as belonging to the XII group of LRR-RKs  
606 (Magalhães *et al.*, 2016), and might thus be involved in the perception of some unknown  
607 *Xylella*-derived PAMP(s).

608 In summary, our results showed that the expression of *EFR* in sweet orange  
609 triggers ligand-dependent activation of defense responses, leading to improved resistance  
610 against major citrus bacterial pathogens. The increments on resistance aiming at avoiding  
611 or decreasing the use of agrochemical inputs is economically viable and sustainable.  
612 Although few studies have been carried out for characterization under field conditions,  
613 tomato EFR-expressing plants have been evaluated for field trials, showing promising  
614 results for bacterial disease management caused by *R. solanacearum* and *X. performans*  
615 (Kunwar *et al.*, 2018). This opens possibilities and encourages the use of PRRs to confer  
616 broad-spectrum resistance as a strategic approach that may support biotechnology citrus  
617 breeding programs.

618

## 619 **Acknowledgments**

620 We thank L. F. C. Silva from the Centro de Citricultura “Sylvio Moreira” at the Instituto  
621 Agrônômico de Campinas (IAC) for greenhouse assistance. This work was supported by  
622 a research grant from the Fundação de Amparo à Pesquisa do Estado de São Paulo  
623 (2013/10957-0) and INCT-Citros (Fapesp 2014/50880-0 and CNPq 465440/2014-2).  
624 LKM and DMM, Ph.D. candidates from the Graduate Program in Genetics and Molecular  
625 Biology (Unicamp), were supported by fellowships from Coordenação de  
626 Aperfeiçoamento de Pessoal de Nível Superior grant 001 and FAPESP (2013/01412-0),  
627 respectively. NSTS is a postdoctoral fellow supported by FAPESP (2019/01447-5). AAS  
628 is a recipient of research fellowships from CNPq. Work in the Zipfel laboratory on the  
629 interfamily transfer of EFR is funded by the Gatsby Charitable Foundation and the  
630 2Blades Foundation. Research in the Robatzek laboratory is funded by the Deutsche

631 Forschungsgemeinschaft (DFG), supporting S.R. with a Heisenberg fellowship (RO  
632 3550/14-1) and K.R. with an accompanying grant (RO 3550/13-1).

633

#### 634 **Author contribution statement**

635 AAS, SR and CZ conceived and designed this research. LKM, NSTS, DMM, RRSN, and  
636 KR conducted experiments and analyzed data. LKM and NSTS drafted the manuscript.  
637 LKM, NSTS, KR, SR, AAS, and CZ contributed to the interpretation of the data and  
638 provided intellectual input. AAS and CZ provided reagents, analytical tools, and revised  
639 the manuscript. All authors read and approved the final manuscript.

640

#### 641 **REFERENCES**

642

- 643 Almeida, R.P.P., De La Fuente, L., Koebnik, R., Lopes, J.R.S., Parnell, S., and Scherm,  
644 H. (2019) *Addressing the New Global Threat of Xylella fastidiosa*. *Phytopathology*,  
645 **109**, 172–174.
- 646 Bahar, O., Mordukhovich, G., Luu, D.D., Schwessinger, B., Daudi, A., Jehle, A.K., et  
647 al. (2016) *Bacterial outer membrane vesicles induce plant immune responses*. *Mol.*  
648 *Plant-Microbe Interact.*, **29**, 374–384.
- 649 Berger, R.D. (1988) *The Analysis of Effects of Control Measures on the Development of*  
650 *Epidemics*. In: *Experimental Techniques in Plant Disease Epidemiology*, pp. 137–  
651 151. Springer Berlin Heidelberg.
- 652 Boschi, F., Schwartzman, C., Murchio, S., Ferreira, V., Siri, M.I., Galván, G.A., et al.  
653 (2017) *Enhanced bacterial wilt resistance in potato through expression of*  
654 *Arabidopsis EFR and introgression of quantitative resistance from Solanum*  
655 *commersonii*. *Front. Plant Sci.*, **8**, 1642.
- 656 Boutrot, F. and Zipfel, C. (2017) *Function, discovery, and exploitation of plant pattern*  
657 *recognition receptors for broad-spectrum disease resistance*. *Annu. Rev.*  
658 *Phytopathol.*, **55**, 257–286.
- 659 Caserta, R., Picchi, S.C., Takita, M.A., Tomaz, J.P., Pereira, W.E.L., Machado, M.A., et  
660 al. (2014) *Expression of Xylella fastidiosa RpfF in citrus disrupts signaling in*  
661 *Xanthomonas citri subsp. citri and thereby its virulence*. *Mol. Plant-Microbe*  
662 *Interact.*, **27**, 1241–1252.
- 663 Caserta, R., Souza-Neto, R.R., Takita, M.A., Lindow, S.E., and De Souza, A.A. (2017)  
664 *Ectopic expression of Xylella fastidiosa rpfF conferring production of diffusible*  
665 *signal factor in transgenic tobacco and citrus alters pathogen behavior and*  
666 *reduces disease severity*. *Mol. Plant-Microbe Interact.*, **30**, 866–875.
- 667 Caserta, R., Teixeira-Silva, N.S., Granato, L.M., Dorta, S.O., Rodrigues, C.M., Mitre,  
668 L.K., et al. (2020) *Citrus biotechnology: What has been done to improve disease*  
669 *resistance in such an important crop?* *Biotechnol. Res. Innov.*, **3**, 95–109.
- 670 Coletta-Filho, H. Della, Castillo, A.I., Laranjeira, F.F., de Andrade, E.C., Silva, N.T., de  
671 Souza, A.A., et al. (2020) *Citrus Variegated Chlorosis: an Overview of 30 Years of*  
672 *Research and Disease Management*. *Trop. Plant Pathol.*, **45**, 175–191.
- 673 Davis, M.J., French, W.J., and Schaad, N.W. (1981) *Axenic Culture of the Bacteria*  
674 *Associated with Phony Disease of Peach and Plum Leaf Scald*. *Curr. Microbiol.*, **6**,

- 675 309–314.
- 676 Domínguez, A., Cervera, M., Pérez, R.M., Romero, J., Fagoaga, C., Cubero, J., et al.  
677 (2004) *Characterisation of regenerants obtained under selective conditions after*  
678 *Agrobacterium-mediated transformation of citrus explants reveals production of*  
679 *silenced and chimeric plants at unexpected high frequencies. Mol. Breed.*, **14**, 171–  
680 183.
- 681 Doyle, J.J. and Doyle, J.L. (1990) *Isolation of plant DNA from fresh tissue. Focus*  
682 *(Madison)*., **12**, 13–15.
- 683 Feitosa-Junior, O.R., Stefanello, E., Zaini, P.A., Nascimento, R., Pierry, P.M.,  
684 Dandekar, A.M., et al. (2019) *Proteomic and metabolomic analyses of Xylella*  
685 *fastidiosa OMV-enriched fractions reveal association with virulence factors and*  
686 *signaling molecules of the DSF family. Phytopathology*, **109**, 1344–1353.
- 687 Furukawa, T., Inagaki, H., Takai, R., Hirai, H., and Che, F.S. (2014) *Two distinct EF-Tu*  
688 *epitopes induce immune responses in rice and Arabidopsis. Mol. Plant-Microbe*  
689 *Interact.*, **27**, 113–124.
- 690 Ge, Q., Cobine, P.A., and de la Fuente, L. (2020) *Copper supplementation in watering*  
691 *solution reaches the xylem but does not protect tobacco plants against Xylella*  
692 *fastidiosa infection. Plant Dis.*, **104**, 724–730.
- 693 Gómez-Gómez, L. and Boller, T. (2000) *FLS2: An LRR receptor-like kinase involved in*  
694 *the perception of the bacterial elicitor flagellin in Arabidopsis. Mol. Cell*, **5**, 1003–  
695 1011.
- 696 Gómez, L.M., Teixeira-Silva, N.S., Caserta, R., Takita, M.A., Marques, M.O.M., and de  
697 Souza, A.A. (2020) *Overexpression of Citrus reticulata SAMT in Nicotiana*  
698 *tabacum increases MeSA volatilization and decreases Xylella fastidiosa symptoms.*  
699 *Planta*, **252**, 1–14.
- 700 Hao, G., Pitino, M., Duan, Y., and Stover, E. (2016) *Reduced susceptibility to*  
701 *Xanthomonas citri in transgenic citrus expressing the FLS2 receptor from*  
702 *Nicotiana benthamiana. Mol. Plant-Microbe Interact.*, **29**, 132–142.
- 703 Hind, S.R., Strickler, S.R., Boyle, P.C., Dunham, D.M., Bao, Z., O’Doherty, I.M., et al.  
704 (2016) *Tomato receptor FLAGELLIN-SENSING 3 binds flgII-28 and activates the*  
705 *plant immune system. Nat. Plants*, **2**.
- 706 Holton, N., Nekrasov, V., Ronald, P.C., and Zipfel, C. (2015) *The phylogenetically-*  
707 *related Pattern Recognition Receptors EFR and XA21 recruit similar immune*  
708 *signaling components in monocots and dicots. PLoS Pathog.*, **11**, e100460202.
- 709 Ionescu, M., Zaini, P.A., Baccari, C., Tran, S., Da Silva, A.M., and Lindow, S.E. (2014)  
710 *Xylella fastidiosa outer membrane vesicles modulate plant colonization by*  
711 *blocking attachment to surfaces. Proc. Natl. Acad. Sci. U. S. A.*, **111**, E3910–  
712 E3918.
- 713 Katsuragi, Y., Takai, R., Furukawa, T., Hirai, H., Morimoto, T., Katayama, T., et al.  
714 (2015) *CD2-1, the C-terminal region of flagellin, modulates the induction of*  
715 *immune responses in rice. Mol. Plant-Microbe Interact.*, **28**, 648–658.
- 716 Kunwar, S., Iriarte, F., Fan, Q., Da Silva, E.E., Ritchie, L., Nguyen, N.S., et al. (2018)  
717 *Transgenic expression of EFR and Bs2 genes for field management of bacterial*  
718 *wilt and bacterial spot of tomato. Phytopathology*, **108**, 1402–1411.
- 719 Kunze, G., Zipfel, C., Robatzek, S., Niehaus, K., Boller, T., and Felix, G. (2004) *The N*  
720 *terminus of bacterial elongation factor Tu elicits innate immunity in Arabidopsis*  
721 *plants. Plant Cell*, **16**, 3496–3507.
- 722 Lacombe, S., Rougon-Cardoso, A., Sherwood, E., Peeters, N., Dahlbeck, D., Van Esse,  
723 H.P., et al. (2010) *Interfamily transfer of a plant pattern-recognition receptor*  
724 *confers broad-spectrum bacterial resistance. Nat. Biotechnol.*, **28**, 365–369.

- 725 Lamichhane, J.R., Osdaghi, E., Behlau, F., Köhl, J., Jones, J.B., and Aubertot, J.N.  
726 (2018) *Thirteen decades of antimicrobial copper compounds applied in*  
727 *agriculture. A review. Agron. Sustain. Dev.*, **38**, 1–18.
- 728 Livak, K.J. and Schmittgen, T.D. (2001) *Analysis of relative gene expression data using*  
729 *real-time quantitative PCR and the 2- $\Delta\Delta CT$  method. Methods*, **25**, 402–408.
- 730 Lopes, S.A., Raiol, L.L., Torres, S.C.Z., Martins, E.C., Prado, S.S., and Beriam, L.O.S.  
731 (2020) *Differential responses of tobacco to the citrus variegated chlorosis and*  
732 *coffee stem atrophy strains of xylella fastidiosa. Phytopathology*, **110**, 567–573.
- 733 Lu, F., Wang, H., Wang, S., Jiang, W., Shan, C., Li, B., et al. (2015) *Enhancement of*  
734 *innate immune system in monocot rice by transferring the dicotyledonous*  
735 *elongation factor Tu receptor EFR. J. Integr. Plant Biol.*, **57**, 641–652.
- 736 Machado, M.A., Cristofani-Yaly, M., and Bastianel, M. (2011) *Breeding, genetic and*  
737 *genomic of citrus for disease resistance. Rev. Bras. Frutic.*, **33**, 158–172.
- 738 Macho, A.P. and Zipfel, C. (2014) *Plant PRRs and the activation of innate immune*  
739 *signaling. Mol. Cell*, **54**, 263–272.
- 740 Magalhães, D.M., Scholte, L.L.S., Silva, N. V., Oliveira, G.C., Zipfel, C., Takita, M.A.,  
741 and De Souza, A.A. (2016) *LRR-RLK family from two Citrus species: Genome-*  
742 *wide identification and evolutionary aspects. BMC Genomics*, **17**, 1–13.
- 743 Martins, P.M.M., Andrade, M. de O., Benedetti, C.E., and de Souza, A.A. (2020)  
744 *Xanthomonas citri subsp. citri: host interaction and control strategies. Trop. Plant*  
745 *Pathol.*, **45**, 213–236.
- 746 Matsumoto, A., Huston, S.L., Killiny, N., and Igo, M.M. (2012) *XatA, an AT-1*  
747 *autotransporter important for the virulence of Xylella fastidiosa Temecula1.*  
748 *Microbiologyopen*, **1**, 33–45.
- 749 Mendes, B.M.J., Cardoso, S.C., Boscariol-Camargo, R.L., Cruz, R.B., Mourão Filho,  
750 F.A.A., and Bergamin Filho, A. (2010) *Reduction in susceptibility to Xanthomonas*  
751 *axonopodis pv. citri in transgenic Citrus sinensis expressing the rice Xa21 gene.*  
752 *Plant Pathol.*, **59**, 68–75.
- 753 Minsavage, G. V., Thompson, C.M., Hopkins, D.L., Leite, R.M.V.B.C., and Stall, R.E.  
754 (1994) *Development of a Polymerase Chain Reaction Protocol for Detection of*  
755 *Xylella fastidiosa in Plant Tissue. Phytopathology*, **84**, 461.
- 756 Nascimento, R., Gouran, H., Chakraborty, S., Gillespie, H.W., Almeida-Souza, H.O.,  
757 Tu, A., et al. (2016) *The Type II secreted lipase/esterase LesA is a key virulence*  
758 *factor required for Xylella fastidiosa pathogenesis in grapevines. Sci. Rep.*, **6**,  
759 18598.
- 760 Neves, M.F., Trombin, V.G., Marques, V.N., and Franco Martinez, L. (2020) *Global*  
761 *orange juice market: a 16-year summary and opportunities for creating value.*  
762 *Trop. Plant Pathol.*, **45**, 166–174.
- 763 Oliveira, A.C., Vallim, M.A., Semighini, C.P., Araújo, W.L., Goldman, G.H., and  
764 Machado, M.A. (2002) *Quantification of Xylella fastidiosa from citrus trees by*  
765 *real-time polymerase chain reaction assay. Phytopathology*, **92**, 1048–1054.
- 766 Omar, A.A., Murata, M.M., El-Shamy, H.A., Graham, J.H., and Grosser, J.W. (2018)  
767 *Enhanced resistance to citrus canker in transgenic mandarin expressing Xa21*  
768 *from rice. Transgenic Res.*, **27**, 179–191.
- 769 Pereira, W.E.L., Ferreira, C.B., Caserta, R., Melotto, M., and de Souza, A.A. (2019)  
770 *Xylella fastidiosa subsp. pauca and fastidiosa colonize arabidopsis systemically*  
771 *and induce anthocyanin accumulation in infected leaves. Phytopathology*, **109**,  
772 225–232.
- 773 Pfeilmeier, S., George, J., Morel, A., Roy, S., Smoker, M., Stransfeld, L., et al. (2019)  
774 *Expression of the Arabidopsis thaliana immune receptor EFR in Medicago*



- 775 *truncatula* reduces infection by a root pathogenic bacterium, but not nitrogen-  
776 fixing rhizobial symbiosis. *Plant Biotechnol. J.*, **17**, 569–579.
- 777 Pignati, W.A., e Lima, F.A.N. de S., de Lara, S.S., Correa, M.L.M., Barbosa, J.R., Leão,  
778 L.H.D.C., and Pignatti, M.G. (2017) *Spatial distribution of pesticide use in Brazil:*  
779 *a strategy for Health Surveillance. Cien. Saude Colet.*, **22**, 3281–3293.
- 780 Rigano, L.A., Siciliano, F., Enrique, R., Sendín, L., Filippone, P., Torres, P.S., et al.  
781 (2007) *Biofilm formation, epiphytic fitness, and canker development in*  
782 *Xanthomonas axonopodis* pv. *citri*. *Mol. Plant-Microbe Interact.*, **20**, 1222–1230.
- 783 Rodrigues, C.M., de Souza, A.A., Takita, M.A., Kishi, L.T., and Machado, M.A. (2013)  
784 *RNA-Seq analysis of Citrus reticulata in the early stages of Xylella fastidiosa*  
785 *infection reveals auxin-related genes as a defense response. BMC Genomics*, **14**.
- 786 Rodriguez-Moreno, L., Song, Y., and Thomma, B.P. (2017) *Transfer and engineering*  
787 *of immune receptors to improve recognition capacities in crops. Curr. Opin. Plant*  
788 *Biol.*, **38**, 42–49.
- 789 Schoonbeek, H., Wang, H.-H., Stefanato, F.L., Craze, M., Bowden, S., Wallington, E.,  
790 et al. (2015) *Arabidopsis EF-Tu receptor enhances bacterial disease resistance in*  
791 *transgenic wheat. New Phytol.*, **206**, 606–613.
- 792 Schwessinger, B., Bahar, O., Thomas, N., Holton, N., Nekrasov, V., Ruan, D., et al.  
793 (2015) *Transgenic expression of the dicotyledonous Pattern Recognition Receptor*  
794 *EFR in rice leads to ligand-dependent activation of defense responses. PLoS*  
795 *Pathog.*, **11**, : e1004809.
- 796 Schwessinger, B., Roux, M., Kadota, Y., Ntoukakis, V., Sklenar, J., Jones, A., and  
797 Zipfel, C. (2011) *Phosphorylation-dependent differential regulation of plant*  
798 *growth, cell death, and innate immunity by the regulatory receptor-like kinase*  
799 *BAK1. PLoS Genet.*, **7**, e1002046.
- 800 Shi, Q., Febres, V.J., Jones, J.B., and Moore, G.A. (2016) *A survey of FLS2 genes from*  
801 *multiple citrus species identifies candidates for enhancing disease resistance to*  
802 *Xanthomonas citri* ssp. *citri*. *Hortic. Res.*, **3**, 1–11.
- 803 Shi, Q., Febres, V.J., Jones, J.B., and Moore, G.A. (2015) *Responsiveness of different*  
804 *citrus genotypes to the Xanthomonas citri* ssp. *citri*-derived pathogen-associated  
805 *molecular pattern (PAMP) flg22 correlates with resistance to citrus canker. Mol.*  
806 *Plant Pathol.*, **16**, 507–520.
- 807 Da Silva, A.C.R., Ferro, J.A., Reinach, F.C., Farah, C.S., Furlan, L.R., Quaggio, R.B.,  
808 et al. (2002) *Comparison of the genomes of two Xanthomonas pathogens with*  
809 *differing host specificities. Nature*, **417**, 459–463.
- 810 Silva, M.S., De Souza, A.A., Takita, M.A., Labate, C.A., and Machado, M.A. (2011)  
811 *Analysis of the biofilm proteome of Xylella fastidiosa. Proteome Sci.*, **9**.
- 812 Simpson, A.J.G., Reinach, F.C., Arruda, P., Abreu, F.A., Acencio, M., Alvarenga, R., et  
813 al. (2000) *The genome sequence of the plant pathogen Xylella fastidiosa: The*  
814 *Xylella fastidiosa consortium of the organization for nucleotide sequencing and*  
815 *analysis, Sao Paulo, Brazil. Nature*, **406**, 151–157.
- 816 Wan, W.L., Fröhlich, K., Pruitt, R.N., Nürnberger, T., and Zhang, L. (2019) *Plant cell*  
817 *surface immune receptor complex signaling. Curr. Opin. Plant Biol.*, **50**, 18–28.
- 818 Zimaro, T., Thomas, L., Maronedze, C., Garavaglia, B.S., Gehring, C., Ottado, J., and  
819 Gottig, N. (2013) *Insights into Xanthomonas axonopodis* pv. *citri* biofilm through  
820 *proteomics. BMC Microbiol.*, **13**.
- 821 Zipfel, C., Kunze, G., Chinchilla, D., Caniard, A., Jones, J.D.G., Boller, T., and Felix,  
822 G. (2006) *Perception of the bacterial PAMP EF-Tu by the receptor EFR restricts*  
823 *Agrobacterium-mediated transformation. Cell*, **125**, 749–760.
- 824 Zipfel, C. and Oldroyd, G.E.D. (2017) *Plant signalling in symbiosis and immunity.*

825 *Nature*, **543**, 328–336.

826

827 **Supplementary Material**

828

829 **Table S1** List of primers and probes used in this study.

830

| Primer name                | Sequence (5'-3')                                       |
|----------------------------|--------------------------------------------------------|
| FMV_F                      | F- TGGCTTGTGGGGACCAGAC                                 |
| 35S_F                      | F- AGGAGCATCGTGGAAAAAGA                                |
| <i>EFR</i> _R              | R- GAAGCTCACCTCCAAGTCTA                                |
| CVC-1                      | F- AGATGAAAACAATCATGCAAA                               |
| CCSM-1                     | R- GCGCATGCCAAGTCCATATTT                               |
| TAQCVC probe               | (6FAM) AACCGCAGCAGAAGCCGCTCATC (TAMRA)p                |
| <i>EFR</i> _RTqPCR         | F- TGGCTGCAGCTAGAAGATCTGG<br>R- TGGCTGCAGCTAGAAGATCTGG |
| <i>Cyclophilin</i> _RTqPCR | F- AGAGTATGCAGAGGAATGG<br>R- GTCCTTAACAGAAGTCCGT       |
| <i>WRKY23</i> _RTqPCR      | F- CTCCAACTCATCCTCAATCTC<br>R- CTGCTGCTGTTGTTGTTGTT    |
| <i>SGT1</i> _RTqPCR        | F- AGGATGTTGAGACAGTGATGG<br>R- CTCCTCAGGCTTCTGGTAAA    |
| <i>NPR2</i> _RTqPCR        | F- TCCTAGGATGGAAGCCCTTAT<br>R- GGTCGTCCTCCATGAACTTATC  |
| <i>EDS1</i> _RTqPCR        | F- GGCTCGAGTATGCCCTGAAG<br>R- CTTGCCCAGAAACATGATTCC    |

831

832

833 **Table S2** *Citrus* transformation assays performed in Valencia sweet orange for *EFR* gene  
834 transfer. Number of recovered plants and transformation efficiency are indicated.

835

| Experiment | N° of explants | N° of shoots | GUS (+) shoots | PCR (+) plants/<br>Analyzed plants | Transformation efficiency (%)* |
|------------|----------------|--------------|----------------|------------------------------------|--------------------------------|
| 1          | 248            | 121          | 5              | 5/5                                | 2.02                           |
| 2          | 188            | 80           | 3              | 3/3                                | 1.60                           |
| 3          | 151            | 101          | 14             | 5/14                               | 9.27                           |
| 4          | 148            | 96           | 17             | 7/17                               | 11.49                          |

836 \**gus* (+) shoots/total explants infected

837

838

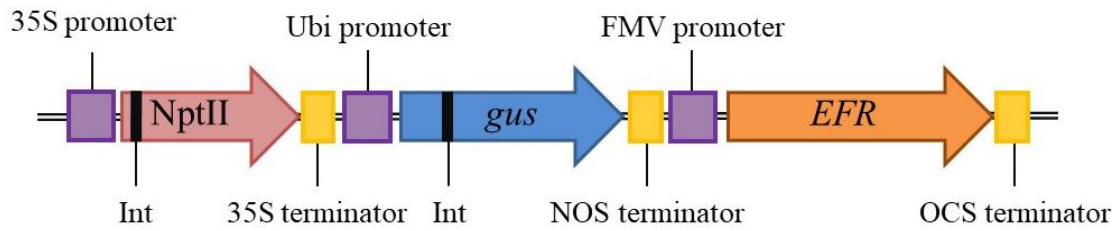

839

840

841 **Fig. S1** Schematic representation of the expression cassette containing the *EFR* gene from  
842 *Arabidopsis* used for sweet orange *Agrobacterium*-mediated transformation. The  
843 neomycin phosphotransferase encoding sequence (*NptII*) used as the plant selection  
844 marker is under the control of the 35S promoter and terminator. The *gus* reporter gene  
845 expression is regulated by the ubiquitin (Ubi) promoter and the nopaline synthase (NOS)  
846 terminator. The *EFR* gene is under the control of the *fig mosaic virus* (*FMV*) promoter  
847 and the *octopine synthase* (*OCS*) terminator.

848

849

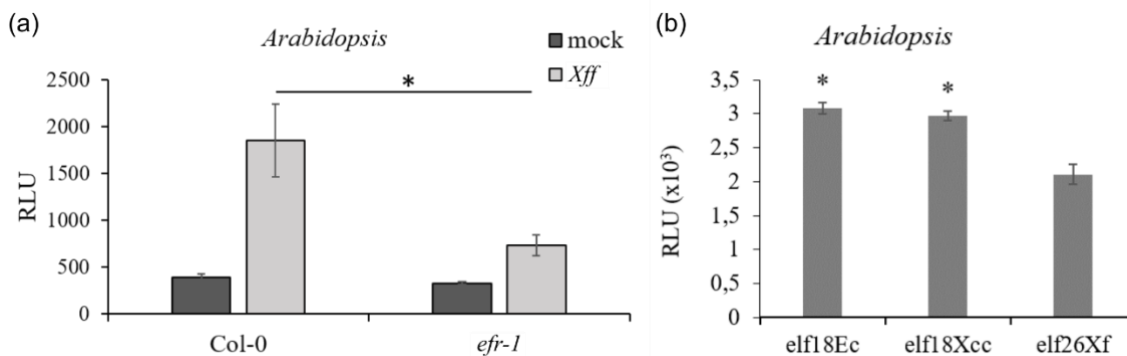

850

851

852 **Fig. S2** ROS burst in Col-0 and *efr-1* mutant after treatment with *Xff* (OD<sub>600</sub> 0.125) and  
853 with multiple elf peptides. (a) Total photon count represented as relative light units  
854 following PAMP treatment (n=10) and (b) ROS production in *Arabidopsis* (Col-0)  
855 triggered by elf18 peptides. Error bars represent standard error of the mean. Statistical  
856 differences are represented by asterisks and were calculated using a two-tailed *t*-test (\* *p*  
857 < 0.05). The experiments were performed twice with similar results.

858

859

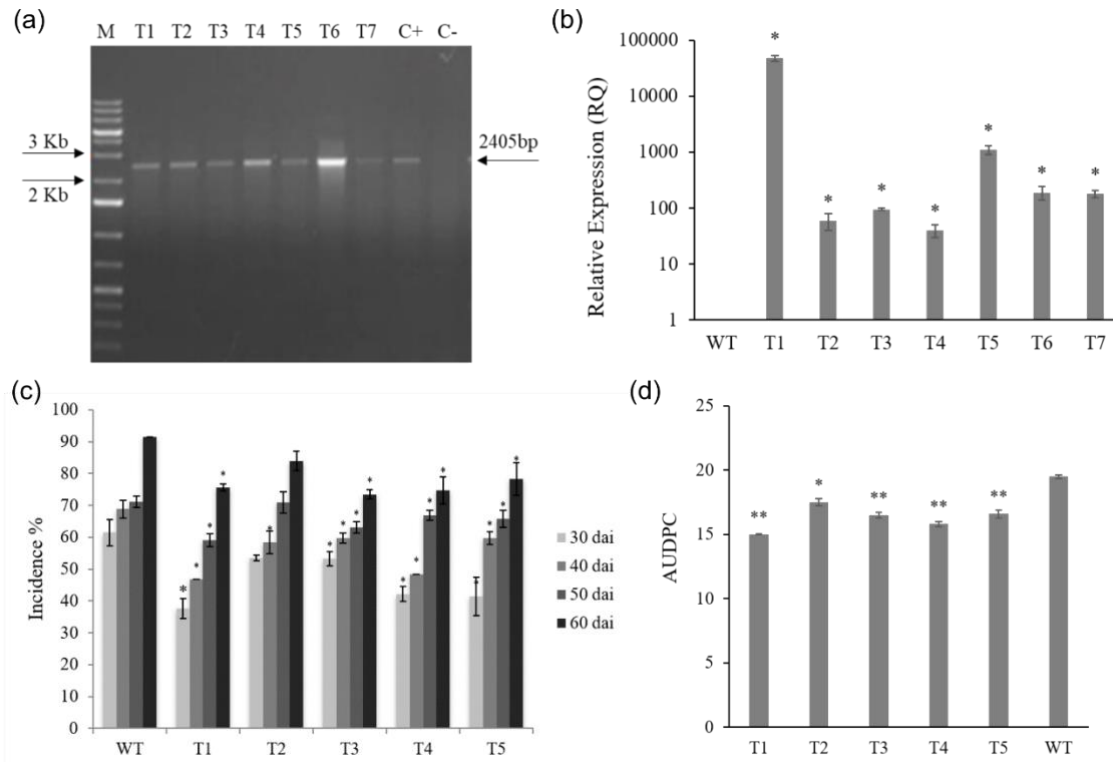

860

861

862 **Fig. S3** Transgenic tobacco expressing *EFR*. (a) PCR confirmation of five transgenic  
863 lines showing the expected amplicon of 2403 bp (black arrow). L = 1Kb DNA ladder  
864 (Thermo Fisher Scientific), T1-T5 = transgenic lines, C+ = positive control (empty  
865 vector), C- = WT tobacco genomic DNA. (b) Relative expression profile of the *EFR*  
866 encoding gene in transgenic tobacco plants. RLU: relative unit of light. Values are means  
867  $\pm$  standard error (SE) of at least six biological replicates. (c) Symptomatology of *X.*  
868 *fastidiosa* infection in *EFR*-expressing transgenic tobacco showing the average disease  
869 incidence in (c) and the area under the disease progress curve (AUDPC) in (d) The  
870 percentage of incidence was used to calculate the disease progression curve at 30, 40, 50  
871 and 60 dai. Results are shown as means of at least three independent biological replicates  
872  $\pm$  standard error (SE). Statistical differences compared to WT were determined by the  
873 Student's *t* test (\*  $p < 0.05$ ; \*\*  $p < 0.01$ ).

874

875

```
AtBAK1 1 MEERL-MIPCFFWLILVLDLVLRVSGNAEGDALSAKNSLADPNKVLQSWDATLVTPCTW
CsBAK1 1 MGKLERVVWAEFLVSIILFFDLRLRVTSNAEGDALNALKTNLADPNNVLQSWDATLVNTPCTW

AtBAK1 60 FHVTCNSDNSVTRVDLGNANLSGQLVMQLGQLPNLQYLELYSNNITGTIPEQLGNLTTELV
CsBAK1 61 FHVTCNSNSVTRVDLGNANLSGQLVSQLGQLTNLQYLELYSNNISGKVPPEELGNLTNLV

AtBAK1 120 SLDLYLNNLSGPIPTTLGRLKSKLRFLRLNNSLSGEIPRSLTAVLTLQVLDLSNNPLTGD
CsBAK1 121 SLDLYLNNLNGPIPTTLGRLKSKLRFLRLNNSLSMGEIPRSLTNVNSLQVLDLSNNPLTGD

AtBAK1 180 IIPVNGSFSFLTPISFANTKLTPLPASPPPTISPTPPSPAGSNRITGATAGGVAAGAALLF
CsBAK1 181 IPTNGSFSFLTPISFANNQIINNPPPSPPPTIQTPTPPGASSGNSATGATAGGVAAGAALLF

AtBAK1 240 AVPAIALAWRRKKPQDHFDFVPAEEDPEVHLGQLKRFSLRELQVADNFNSNKNILGRGG
CsBAK1 241 AAPAIALAWRRKKPEDHFDFVPAEEDPEVHLGQLKRFSLRELQVADNFNSNRNILGRGG

AtBAK1 300 FGVYKGRLDGTLVAVKRLKEERTQGGELQFQTEVEMISMAVHRNLLRLRGFCMTPTER
CsBAK1 301 FGVYKGRLDGSLVAVKRLKEERTQGGELQFQTEVEMISMAVHRNLLRLRGFCMTPTER

AtBAK1 360 LLVYPYMANGSVASCLRERPESSQPPLDWPKRQRIALGSARGLAYLHDHCDPKIIHRDVKA
CsBAK1 361 LLVYPMVNGSVASCLRERQSSQPPLNWSVRKQIALGARGLAYLHDHCDPKIIHRDVKA

AtBAK1 420 ANILLDEEFVAVGDFGLAKLMDYKDTHTVAVRGTIGHIAPEYLSLGKSSSEKTDVFGYG
CsBAK1 421 ANILLDEEFVAVGDFGLAKLMDYKDTHTVAVRGTIGHIAPEYLSLGKSSSEKTDVFGYG

AtBAK1 480 VMLLELITGQRAFDLARLANDDVMLLDWVKGLLKEKLEALVDVLDLQGNKYDEEVEQLI
CsBAK1 481 VMLLELITGQRAFDLARLANDDVMLLDWVKGLLKEKLEQLVDSDEEGNYIEEVEQLI

AtBAK1 540 QVALLCTQSSPMERPKMSEVVRMLEGDGLAERWEEWQKEEMFRQDFNYPTHHPAVSGWII
CsBAK1 541 QVALLCTQGS PMERPKMSEVVRMLEGDGLAERWEEWQKEEMFRQDFNH-TPHPN-NTWIV

AtBAK1 600 GDSTSQIENEYPSGPR
CsBAK1 599 -DSTSHIQPELISGPR
```

876

877

878 **Fig. S4** Protein sequence alignment of BRASSINOSTEROID INSENSITIVE 1-  
879 ASSOCIATED RECEPTOR KINASE 1 (BAK1) of *Arabidopsis* (AtBAK1 –  
880 NP\_567920.1) and its ortholog in *C. sinensis* (CsBAK1 – XP\_006493289.1). The  
881 sequences showed 99% coverage and 91% similarity. The alignment was performed at  
882 the T-Coffee server.

883

884

```
AtBIK1 1 MGSFSSRVKADI-FHNGKSSDL-----YGL-SLSSRKSSSTVAAAQKTEGEILSSTPVK
CsBIK1 1 MGICLSARIKAESPFNTEVSSKYVSSDGNMSSSTGSKVSSLSVPPTPRSEGEILRSNPK

AtBIK1 54 SFTFNEKLAATRNFRPDSVLEGGGFGCVFKGWLDESLTPTKPGTGLVIAVKKLNQEGFQ
CsBIK1 61 SFSFSDLKLAATRNFRPDSVLEGGGFGSVFKGWIDEHSFAATKPGTGMVIAVKRLNQDGFQ

AtBIK1 114 GHREWLTEINYLQQLSHPNLVKLI GYCLEDEHRLLVYEFMOKGSLENHLFRRGAYFKPIP
CsBIK1 121 GHKEWLAEVNYLGQLYHPNLVKLI GYCLEDDHRLLVYEFMPRGSLENHLFRRGYSYFOPLS

AtBIK1 174 WFLRVNVALDAAKGLAFLHSDPVKVIYRDIKASNILLDADYNAKLSDFGLARDGPMGDLS
CsBIK1 181 WNLRLKVALGAAKGVAFHGAETKVIYRDFKTSNILLDTNYNAKLSDFGLAKDGPPTGDQS

AtBIK1 234 YVSTRVMGTYGYAAPEYMSGHLNARS DVYSFGVLLLEILSGKRALDHRPAKEENLVDW
CsBIK1 241 HVSTRVMGTYGYAAPEYLAAGHLTAKSDVYSFGVLLLEMLSGRRAVDKNRPSGEENLVW

AtBIK1 294 ARPYLTSKRKVLIVDNRLTQOYLPEEAVRMAVAVOCLSEPKSRPTMDQVVRALQOQLQ
CsBIK1 301 AKPYLASKRKIFRIIDNRLTGOYTLLEGAYKAATLALRCLSTEGKFRPMAEVVTVLQOQLQ

AtBIK1 354 DNLGKPSQTNFVKDTKKLGFK-TGTTKSEKRFTQKPFGRHLV-
CsBIK1 361 DSSETGNIRCNTHNRPKIRRSADDARSRSVTAYPRPSASPLYA
```

885

886

887 **Fig. S5** Protein sequence alignment of the serine/threonine-protein kinase BOTRYTIS-  
888 INDUCED KINASE 1 (BIK1) from *Arabidopsis* (AtBIK1 – NP\_181496.1) and its  
889 ortholog from *C. sinensis* (CsBIK1 – XP\_006488335.1). The sequences showed 89%  
890 coverage and 80% similarity among the amino acids. The alignment was performed at the  
891 T-Coffee server.
